# Supplementary material for: Novel 5′-Norcarbocyclic Pyrimidine Derivatives as Antibacterial Agents
Source: PubMed Central journal article supplement (PMC6321083; doi:10.3390/molecules23123069), 2018-11-23
Supplement: molecules-23-03069-s001.pdf [file molecules-23-03069-s001.pdf]

# Novel 5'-norcarbocyclic pyrimidine derivatives as antibacterial agents

Anastasia L. Khandazhinskaya,<sup>a,#</sup> Liudmila A. Alexandrova,<sup>a,#</sup> Elena S. Matyugina,<sup>a</sup> Pavel N. Solyev,<sup>a</sup> Olga V. Efremenkova,<sup>b</sup> Karen W. Buckheit,<sup>c</sup> Maggie Wilkinson,<sup>c</sup> Robert W. Buckheit Jr.,<sup>c</sup> Larisa N. Chernousova,<sup>d</sup> Tatiana G. Smirnova,<sup>d</sup> Sofya N. Andreevskaya,<sup>d</sup> Sergey N. Kochetkov, Katherine L. Seley-Radtke<sup>e</sup>

<sup>a</sup> Engelhardt Institute of Molecular Biology RAS, Vavilova 32, Moscow, 119334, Russia

<sup>b</sup> Gause Institute of New Antibiotics, RAMS, Moscow, B. Pirogovskaya 11, 119021, Russia

<sup>c</sup> ImQuest BioSciences, Frederick, Maryland, USA

<sup>d</sup> Central Tuberculosis Research Institute, Yauzskaya Alley 2, Moscow, 107564, Russia

<sup>e</sup> Department of Chemistry & Biochemistry, University of Maryland, Baltimore County, Baltimore, MD 21250, USA

<sup>#</sup> equal contribution

## Supplementary materials

### Table of contents

|                                                                                                       |      |
|-------------------------------------------------------------------------------------------------------|------|
| <sup>1</sup> H NMR for compound 1                                                                     | p. 2 |
| <sup>13</sup> C NMR for compound 1                                                                    | p. 3 |
| <sup>1</sup> H NMR for compound 2                                                                     | p. 4 |
| <sup>13</sup> C NMR for compound 2                                                                    | p. 5 |
| <sup>1</sup> H NMR for compound 3                                                                     | p. 6 |
| <sup>13</sup> C NMR for compound 3                                                                    | p. 7 |
| <sup>1</sup> H NMR for compound 4                                                                     | p. 8 |
| <sup>13</sup> C NMR for compound 4                                                                    | p. 9 |
| <sup>1</sup> H NMR for compound 5                                                                     | p.10 |
| <sup>13</sup> C NMR for compound 5                                                                    | p.11 |
| <sup>1</sup> H NMR for compound 6                                                                     | p.12 |
| <sup>13</sup> C NMR for compound 6                                                                    | p.13 |
| <sup>1</sup> H NMR for compound 7                                                                     | p.14 |
| <sup>13</sup> C NMR for compound 7                                                                    | p.15 |
| <sup>1</sup> H NMR for compound 8                                                                     | p.16 |
| <sup>13</sup> C NMR for compound 8                                                                    | p.17 |
| <sup>1</sup> H NMR for compound 9                                                                     | p.18 |
| <sup>13</sup> C NMR for compound 9                                                                    | p.19 |
| <sup>1</sup> H NMR for compound 10                                                                    | p.20 |
| <sup>13</sup> C NMR for compound 10                                                                   | p.21 |
| <sup>1</sup> H NMR for compound 11                                                                    | p.22 |
| <sup>13</sup> C NMR for compound 11                                                                   | p.23 |
| <sup>1</sup> H NMR for compound 12                                                                    | p.24 |
| <sup>13</sup> C NMR for compound 12                                                                   | p.25 |
| <b>Table.</b> The antimycobacterial activity of 5'-norcarbocyclic derivatives of 5-substituted uracil | p.26 |

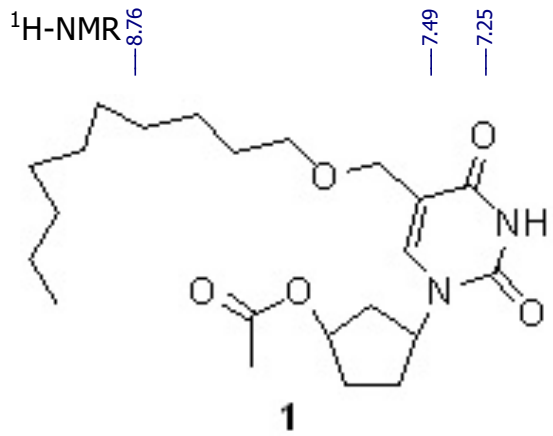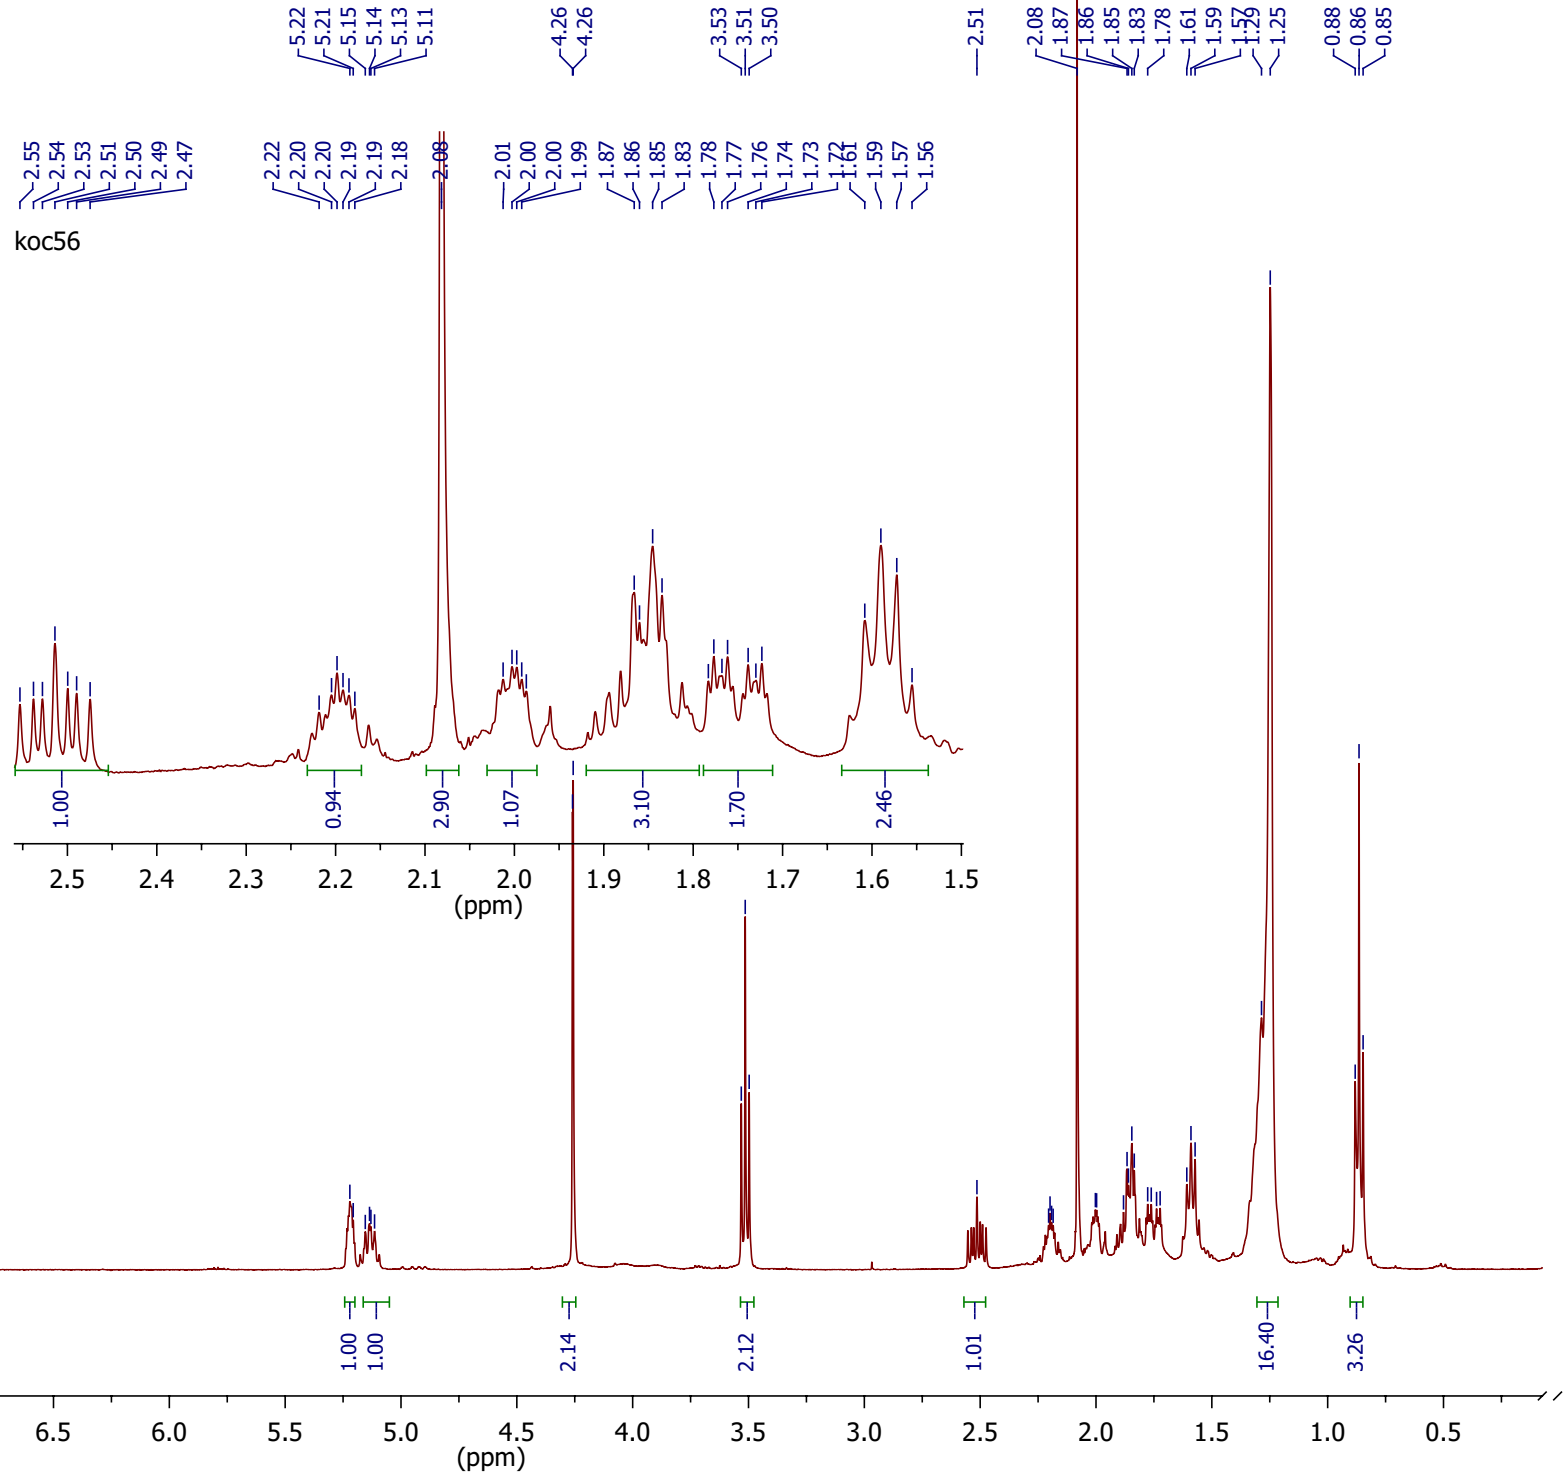

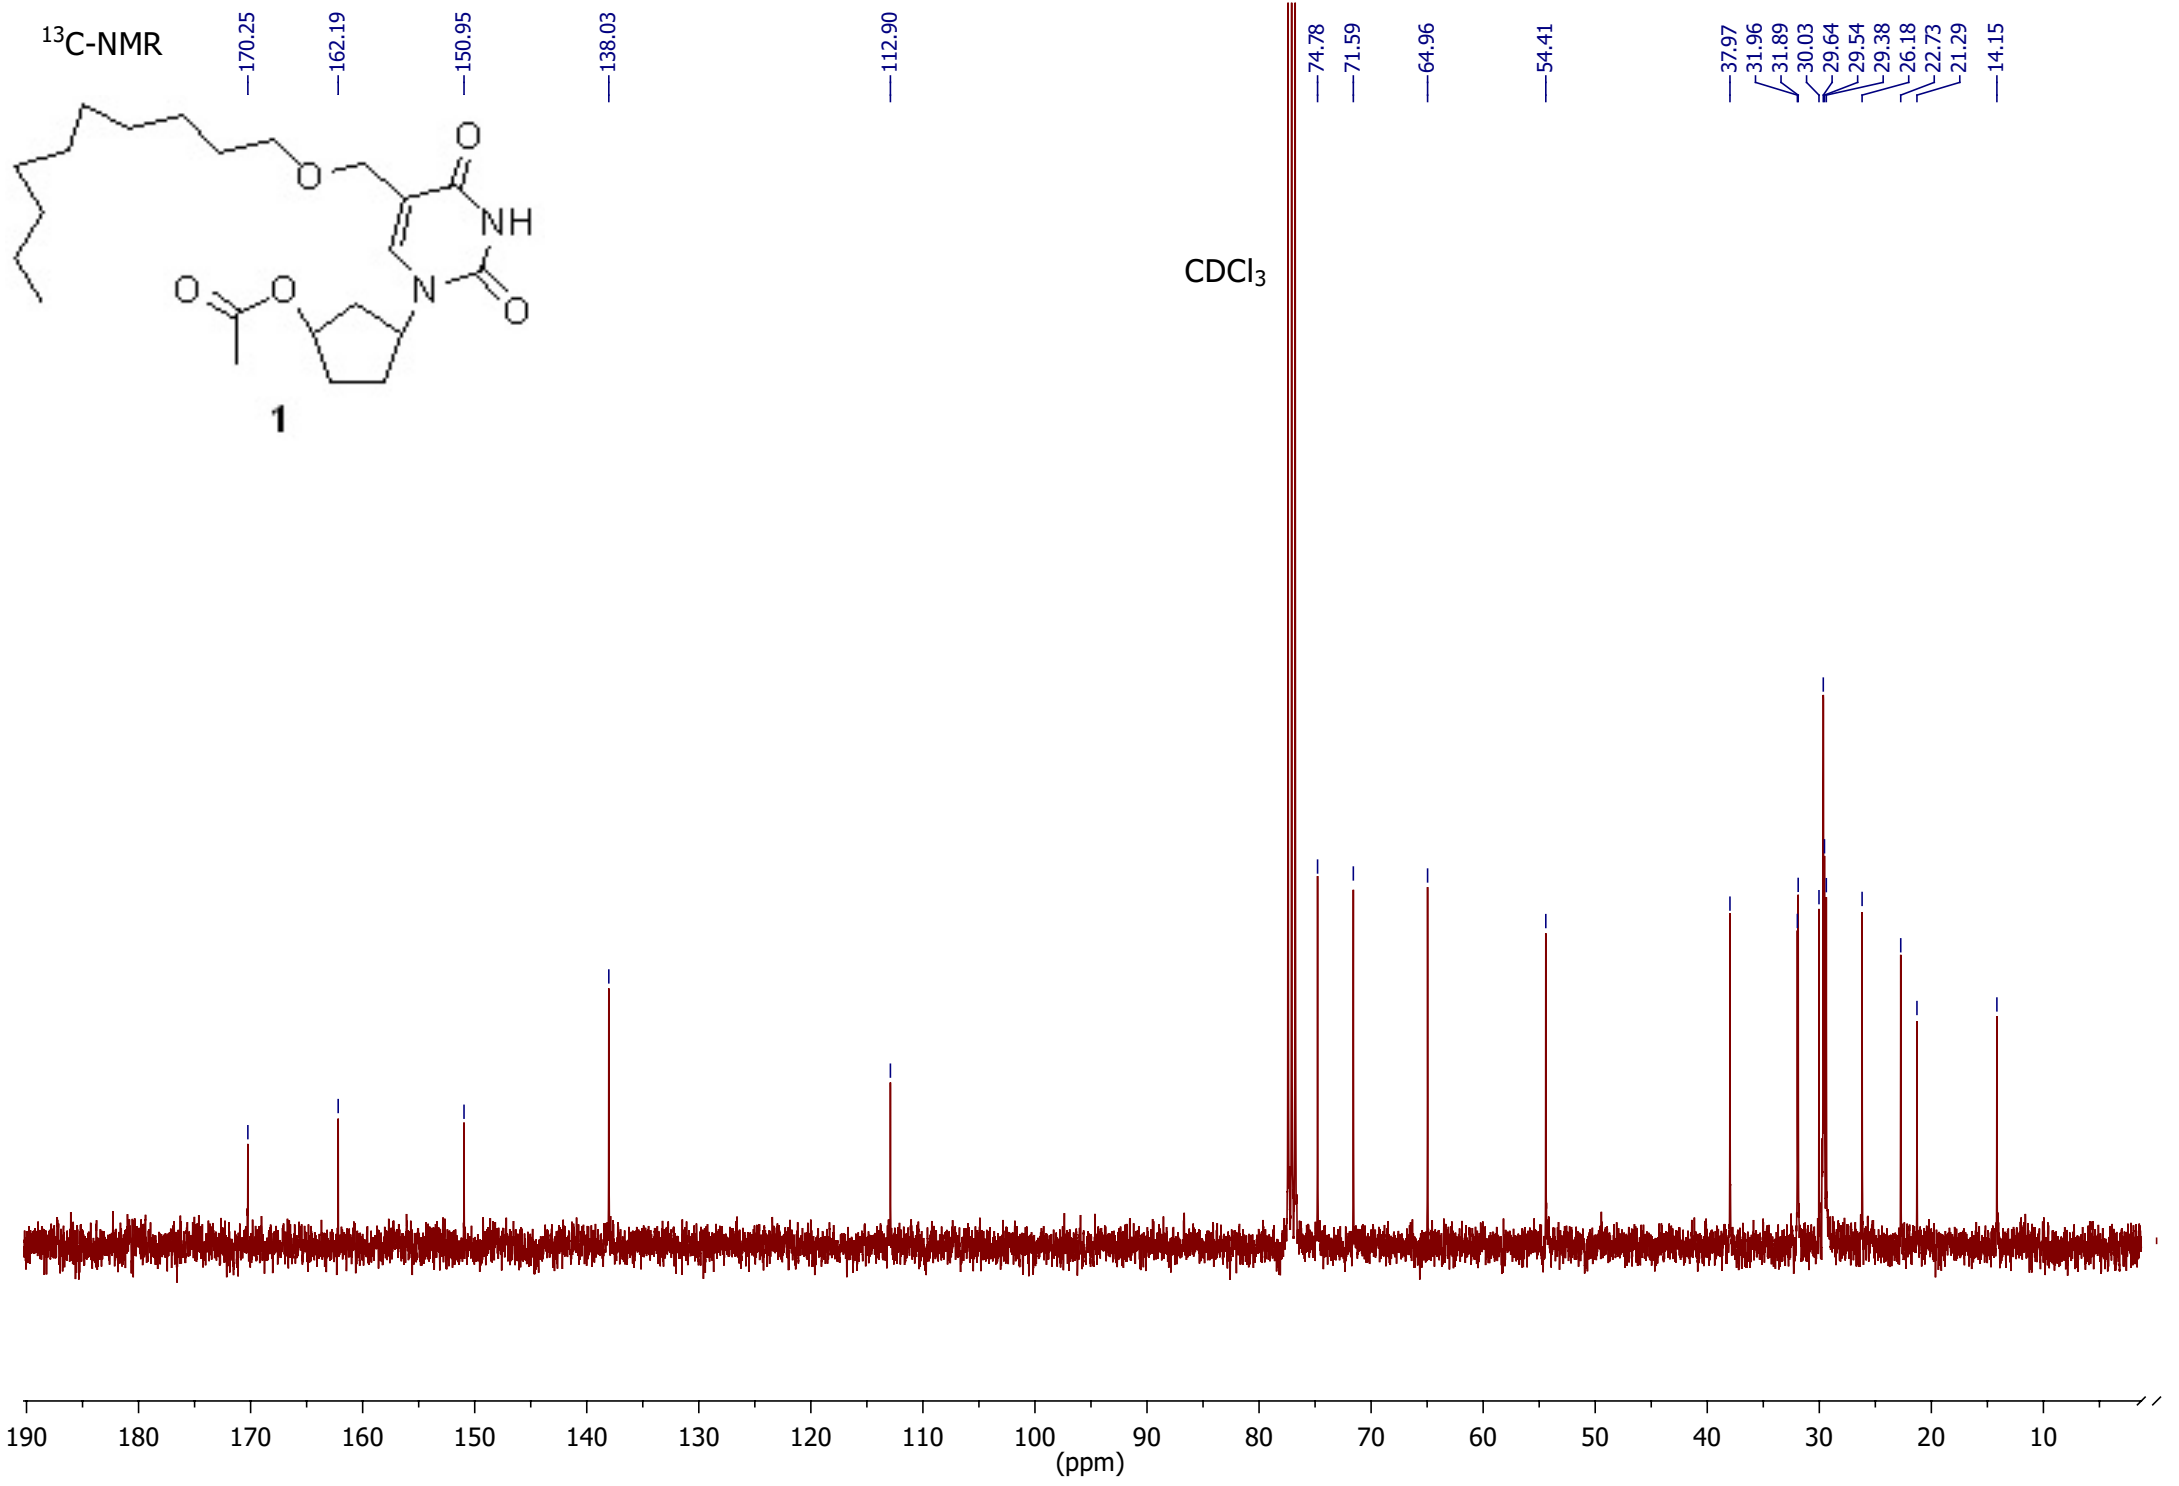

<sup>1</sup>H-NMR

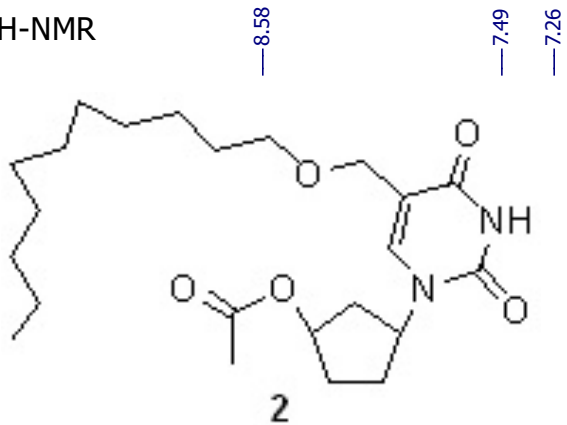

8.58  
7.49  
7.26

5.25  
5.25  
5.24  
5.23  
5.22  
5.21  
5.20  
5.17  
5.17  
5.15  
5.13  
5.11  
4.27  
4.26

3.55  
3.52  
3.50  
2.58  
2.56  
2.54  
2.52  
2.50  
2.49  
2.47  
2.21  
2.20  
2.03  
2.01  
2.01  
1.88  
1.87  
1.85  
1.85  
1.83  
1.79  
1.77  
1.62  
1.60  
1.58  
1.30  
1.26  
0.90  
0.87  
0.85

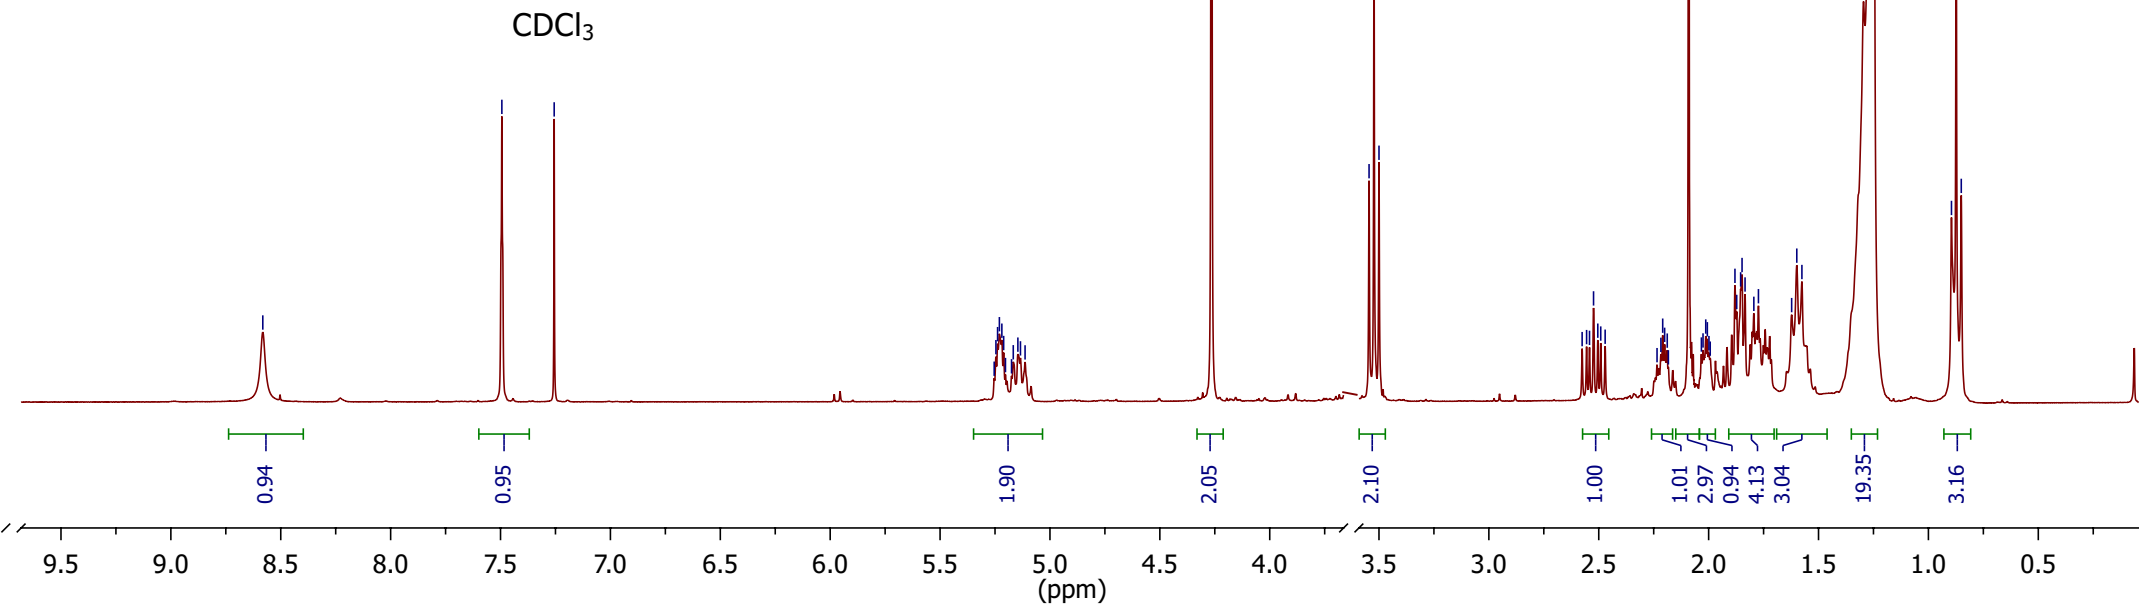

0.94

0.95

1.90

2.05

2.10

1.00

1.01

2.97

0.94

4.13

3.04

19.35

3.16

CDCl<sub>3</sub>

(ppm)

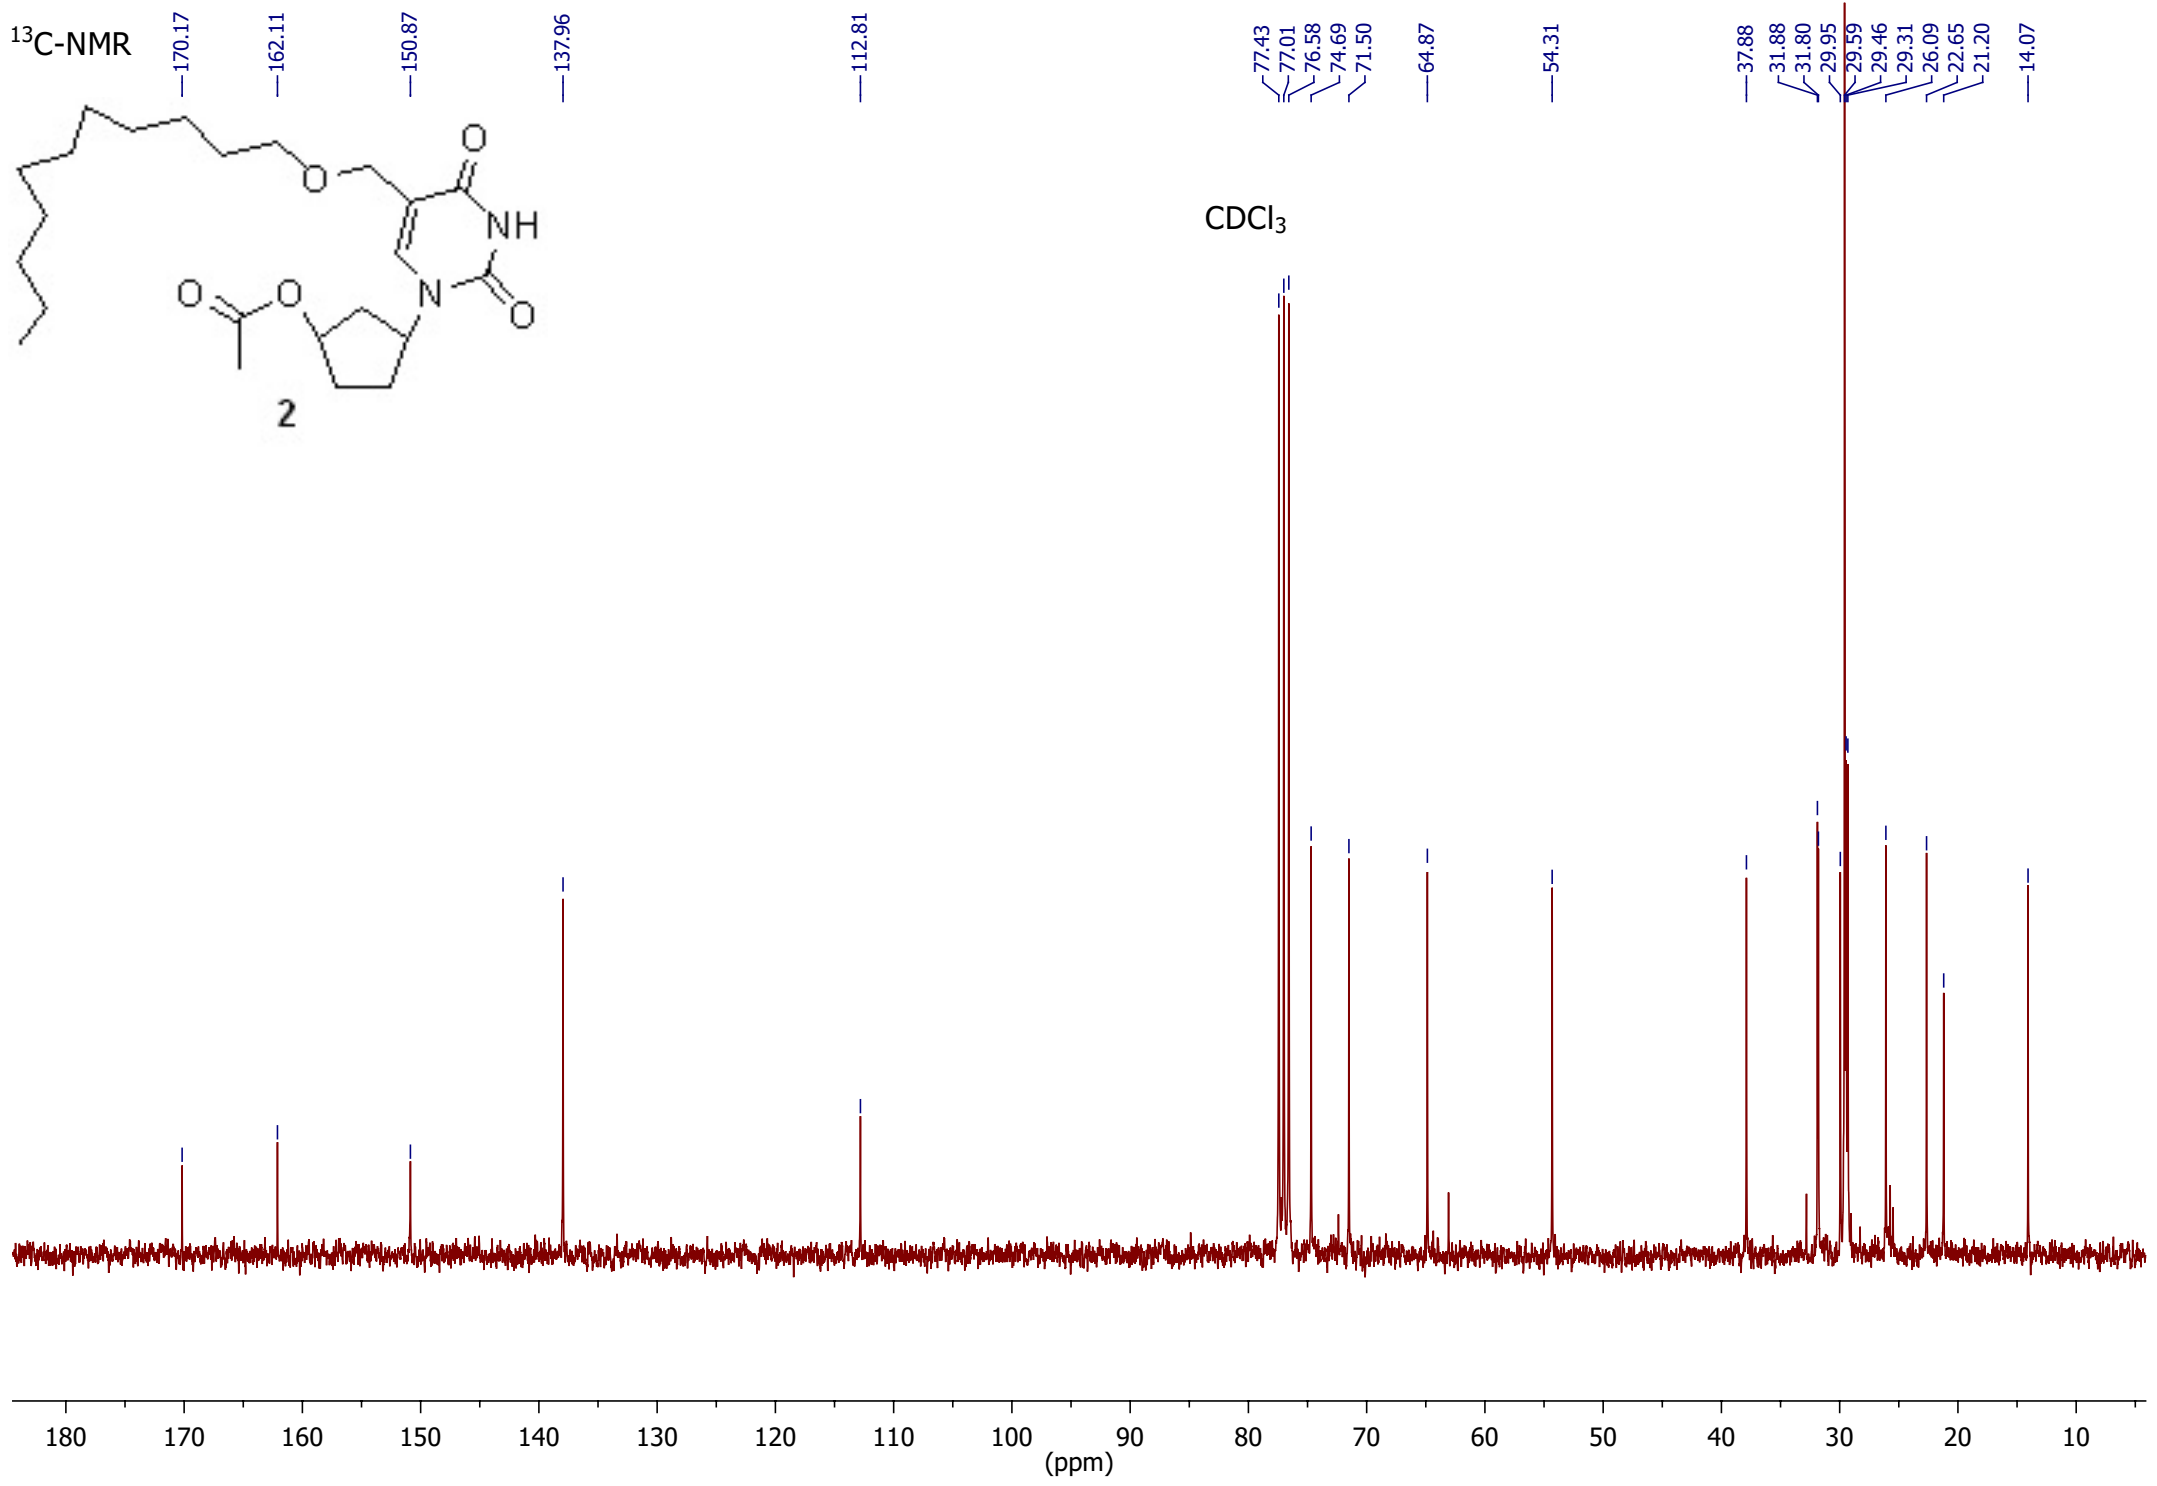

<sup>1</sup>H-NMR

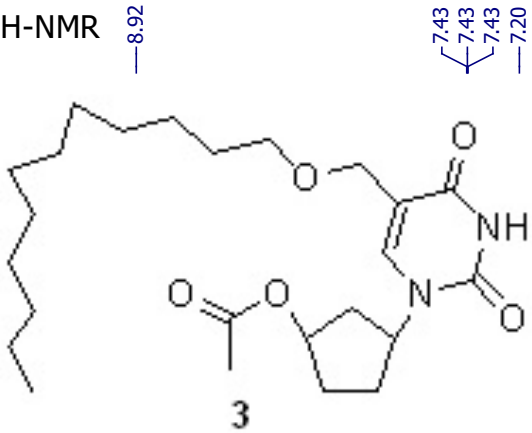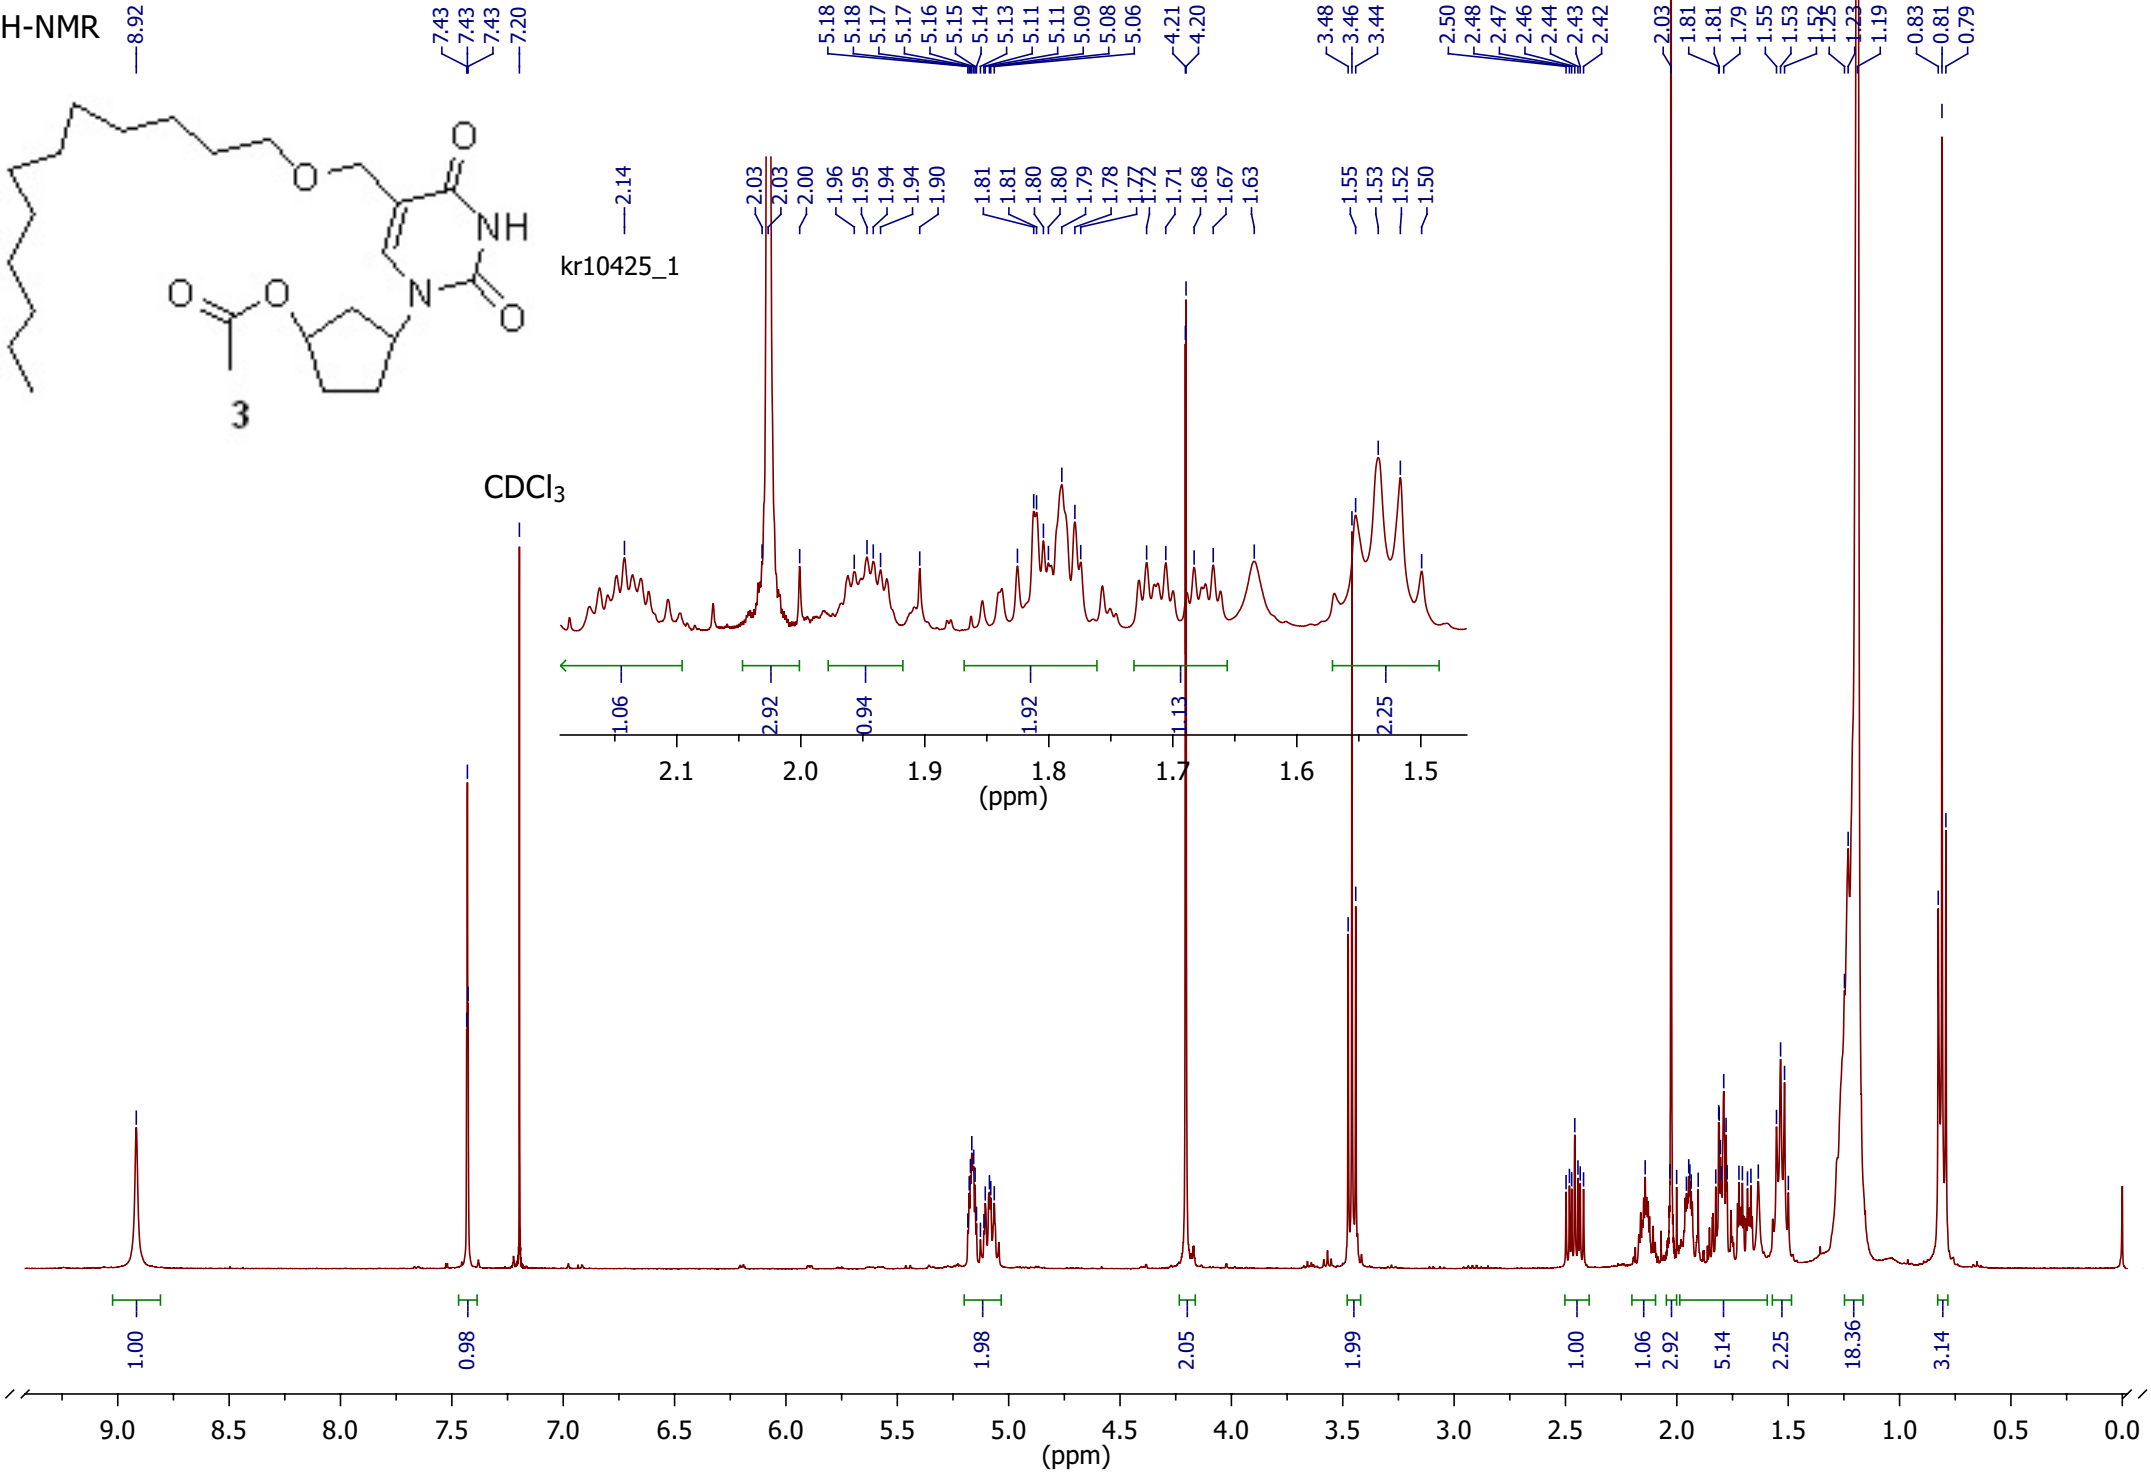

<sup>13</sup>C-NMR

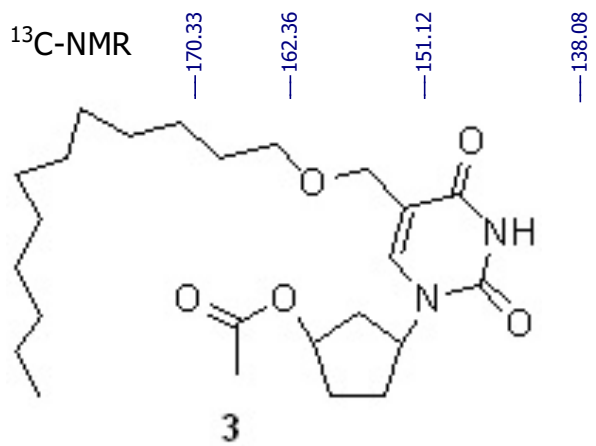

CDCl<sub>3</sub>

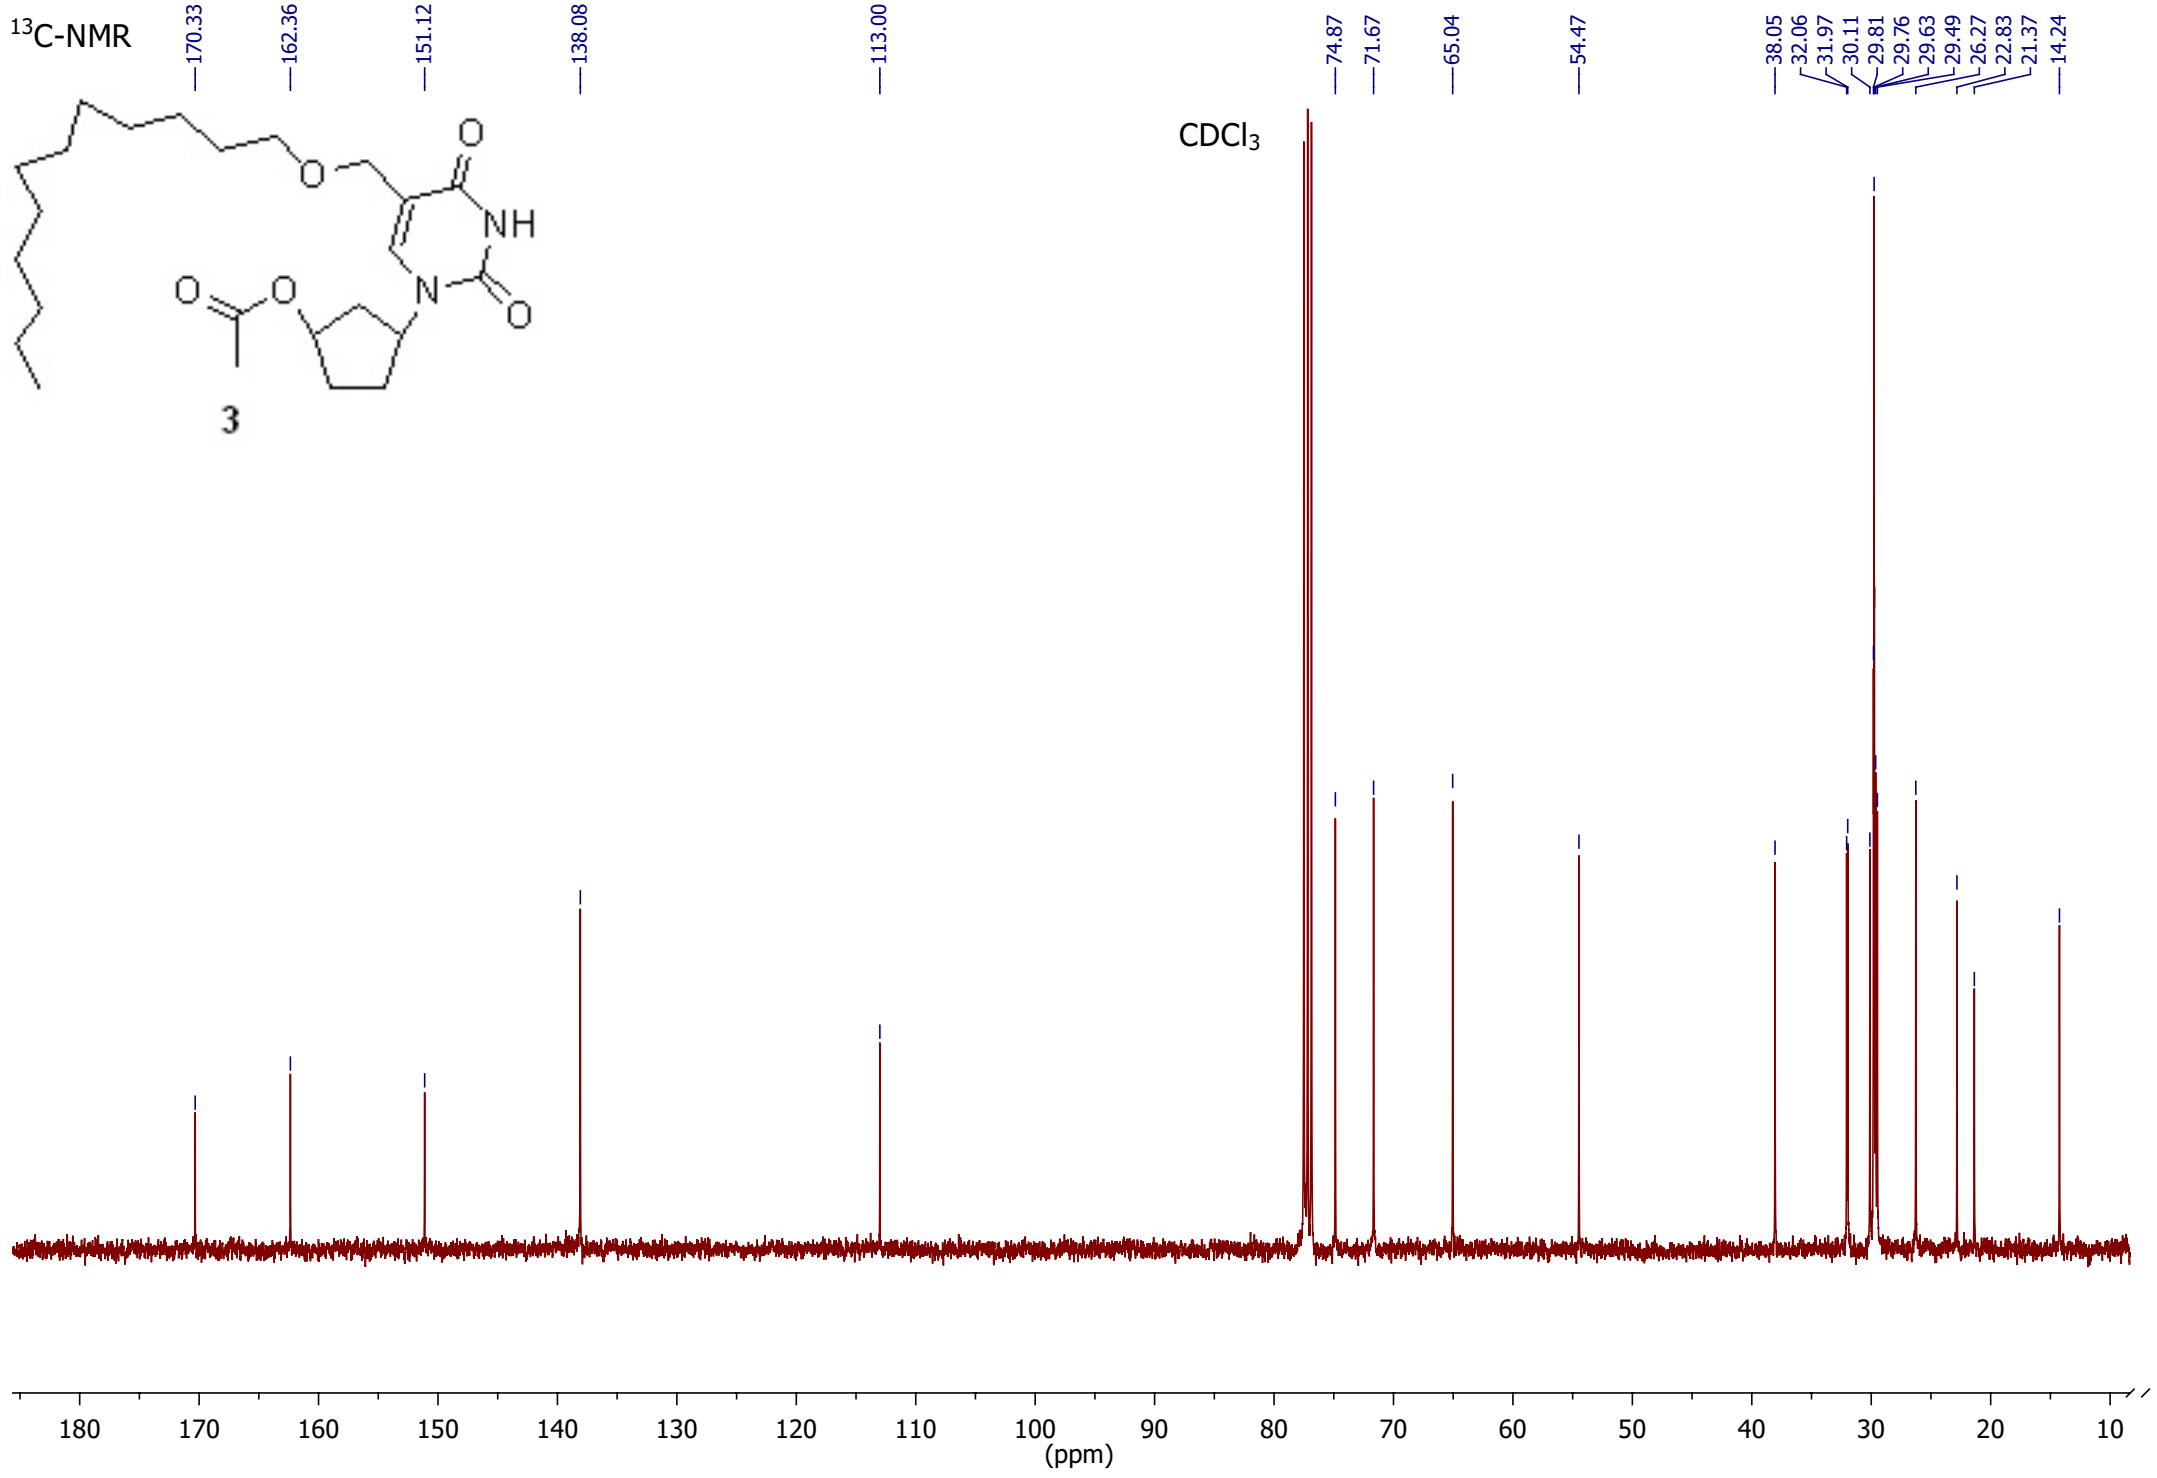

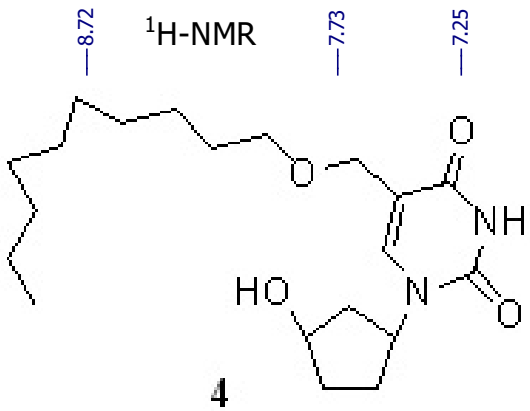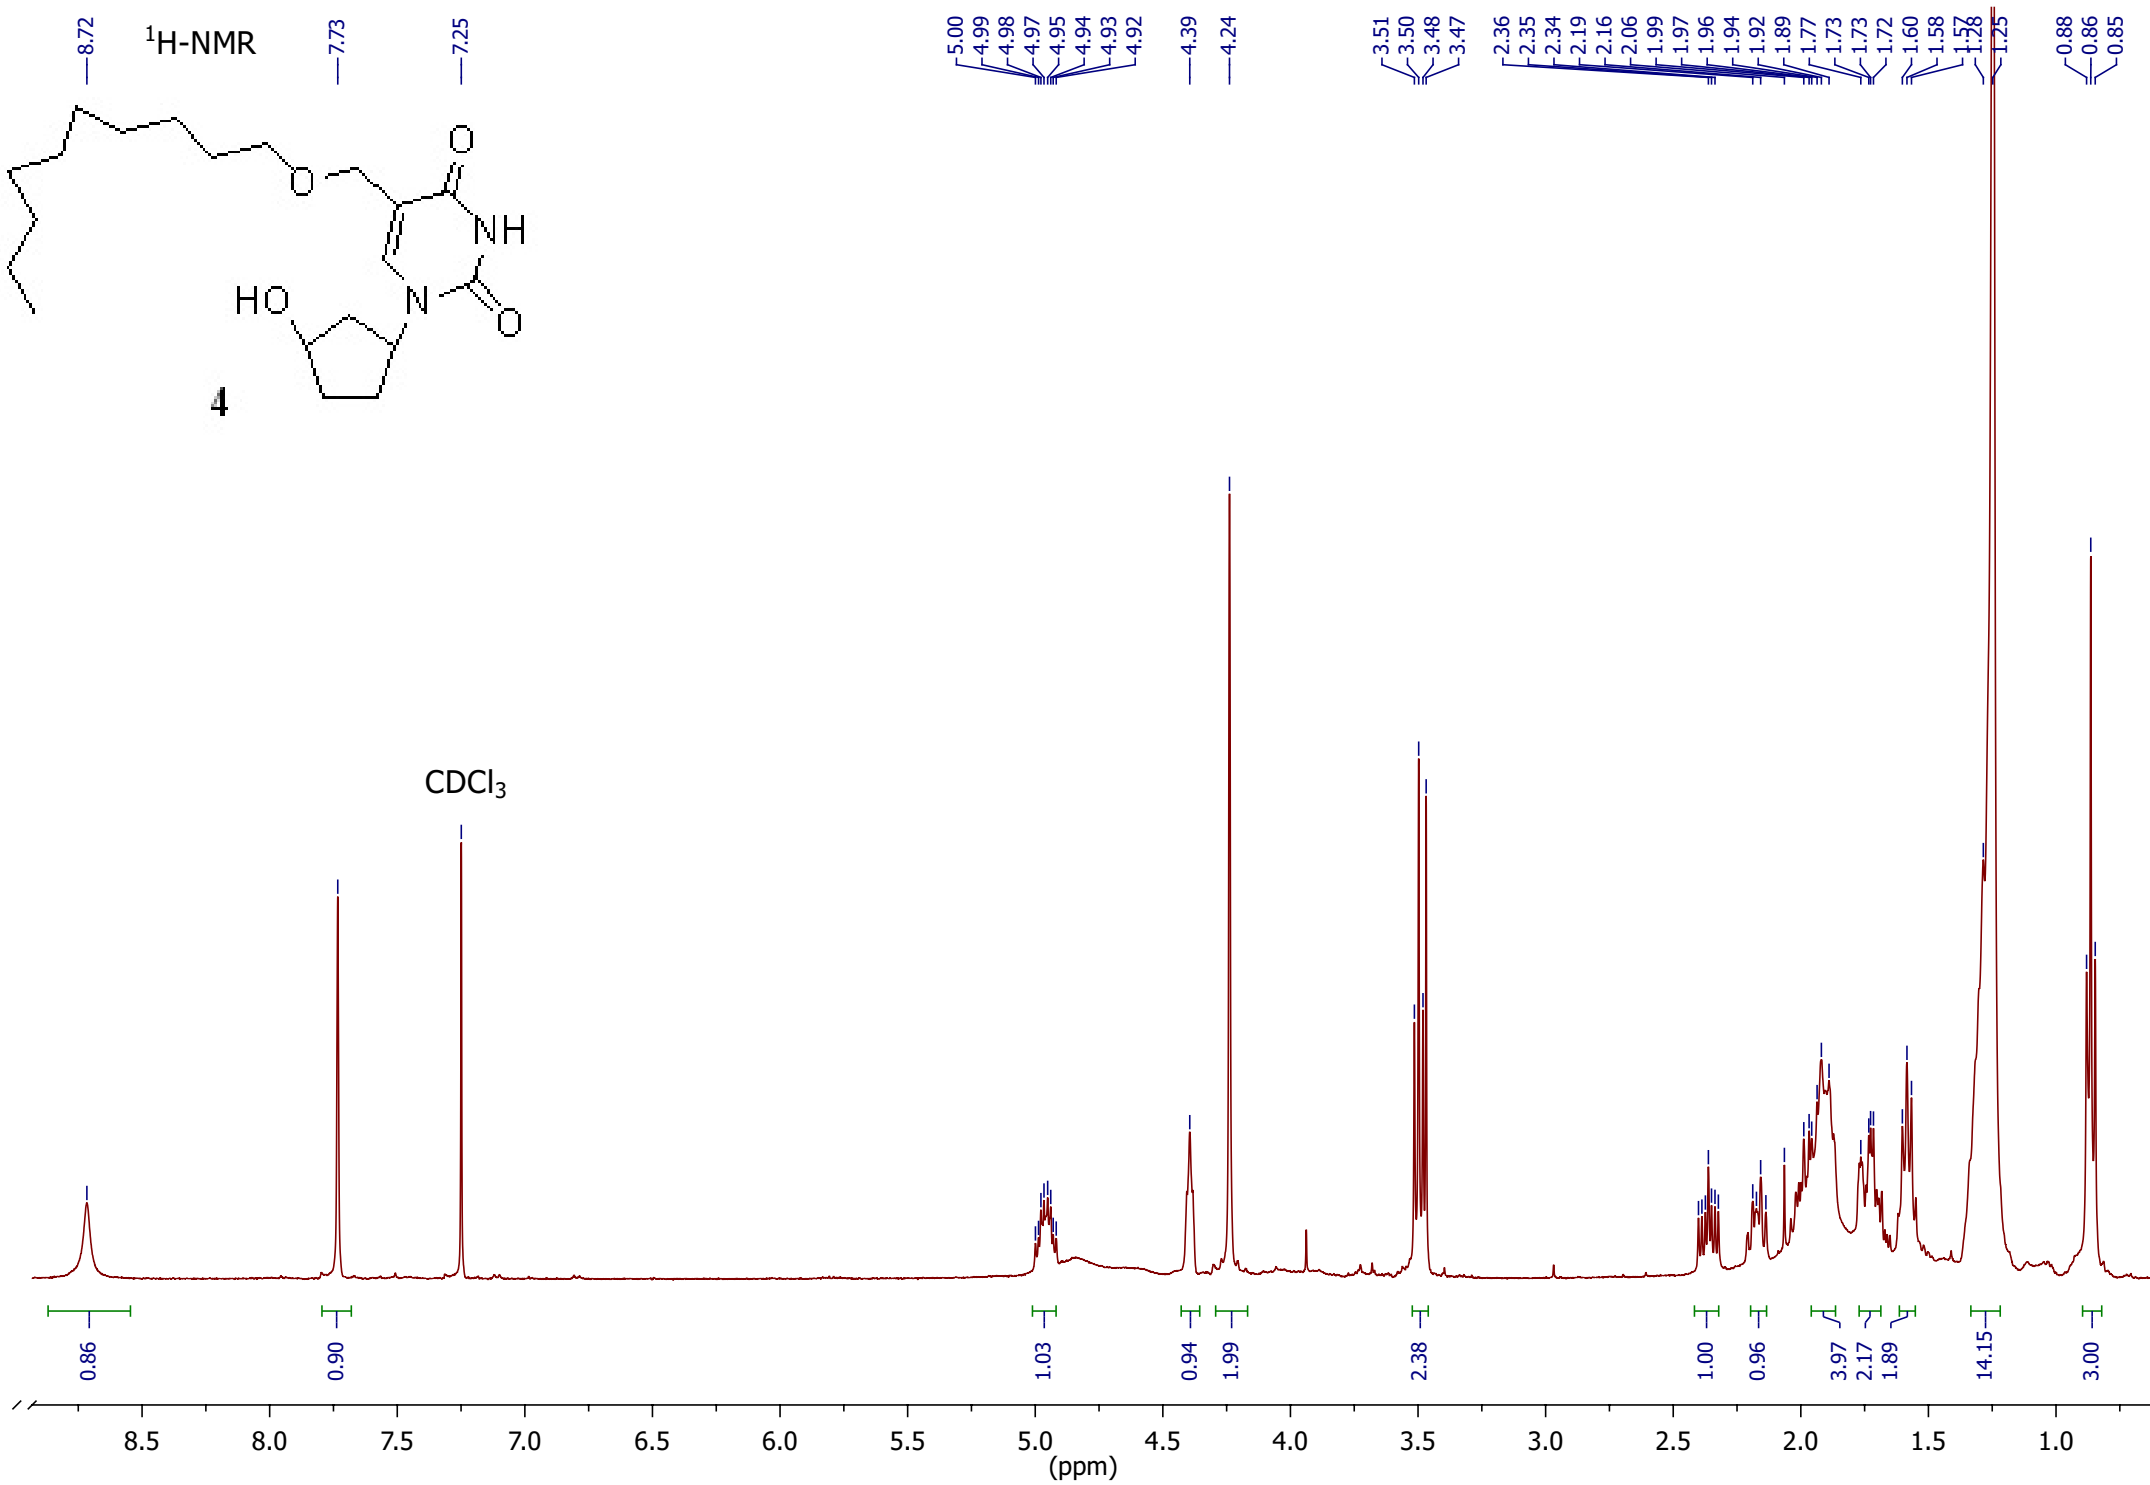



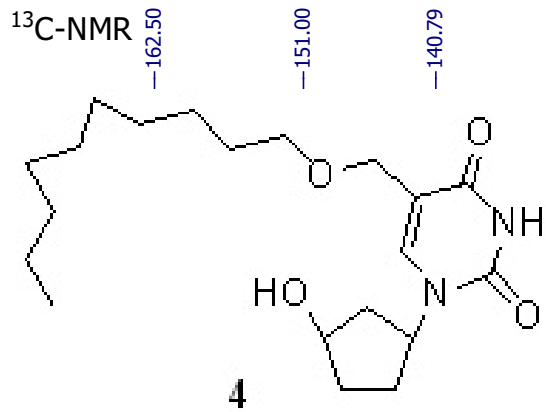

CDCl<sub>3</sub>

—72.22 —71.47 —65.00 —56.40 —40.47 —35.28 —31.98 —29.80 —29.72 —29.69 —29.65 —29.56 —29.40 —26.18 —22.75 —14.16

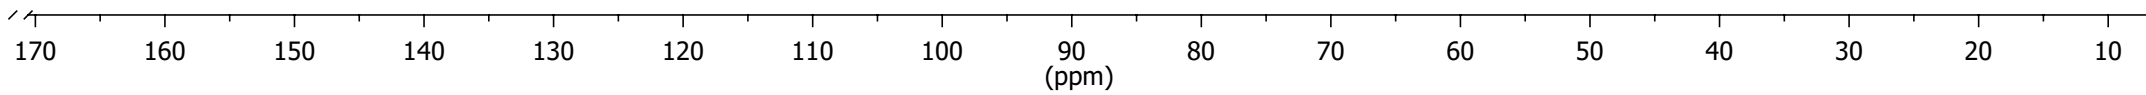

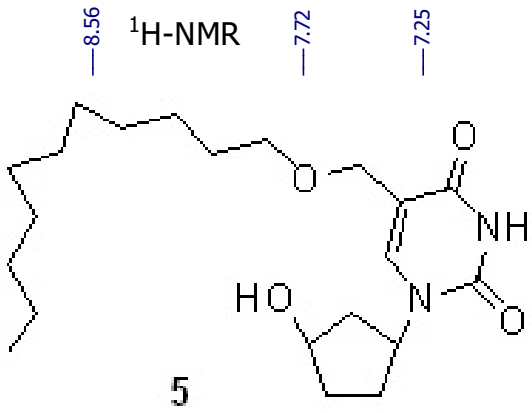

8.56  
7.72  
7.25  
4.98  
4.97  
4.96  
4.95  
4.94  
4.94  
4.40  
4.24  
4.24  
3.52  
3.50  
3.48  
2.37  
2.35  
2.34  
2.33  
2.16  
2.00  
1.97  
1.77  
1.77  
1.76  
1.74  
1.73  
1.72  
1.69  
1.62  
1.61  
1.59  
1.57  
1.50  
1.29  
1.25  
0.88  
0.87  
0.85

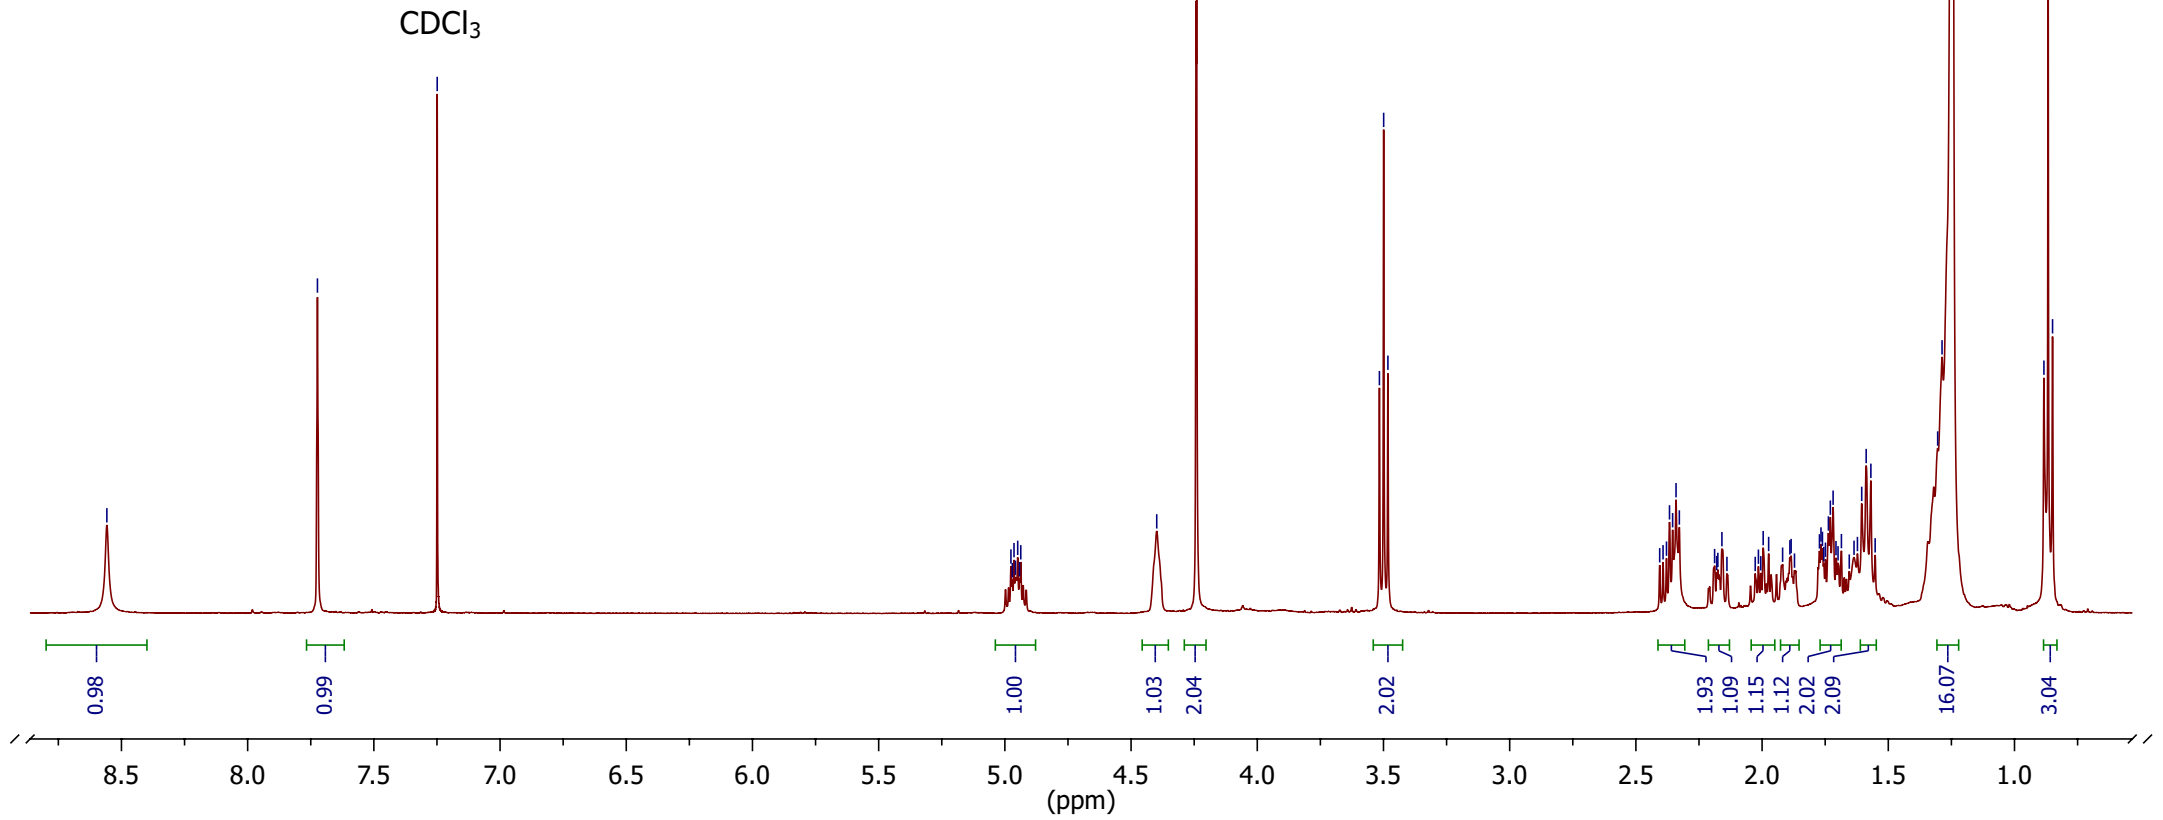

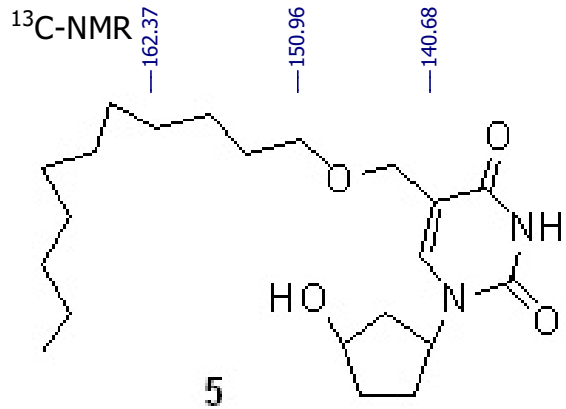

CDCl<sub>3</sub>

72.24 71.47 65.02 56.42 40.45 35.32 31.99 29.78 29.71 29.58 29.42 26.20 22.76 14.18

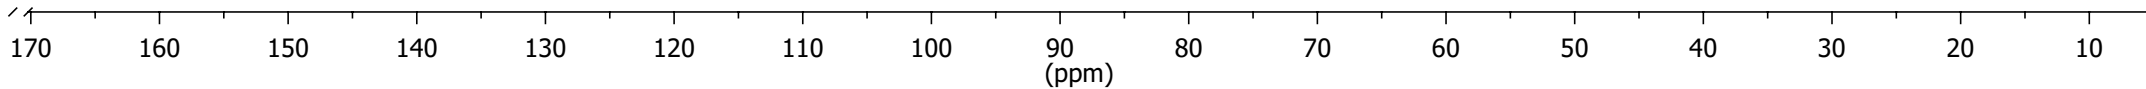

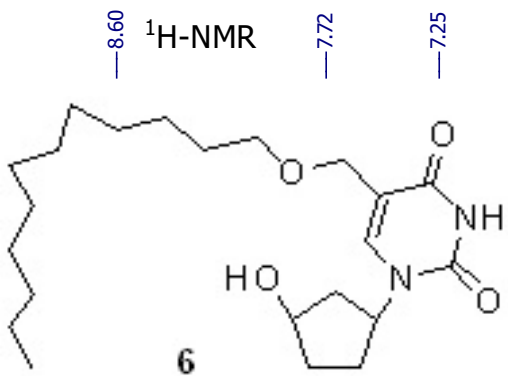

4.97 4.96 4.95 4.94  
 4.40 4.24 4.24  
 3.52 3.50 3.48  
 2.37 2.19 2.17 2.16 2.00 1.98 1.92 1.89 1.77 1.74 1.73 1.72 1.71 1.69 1.61 1.59 1.57 1.56 1.55 1.25  
 0.88 0.87 0.85

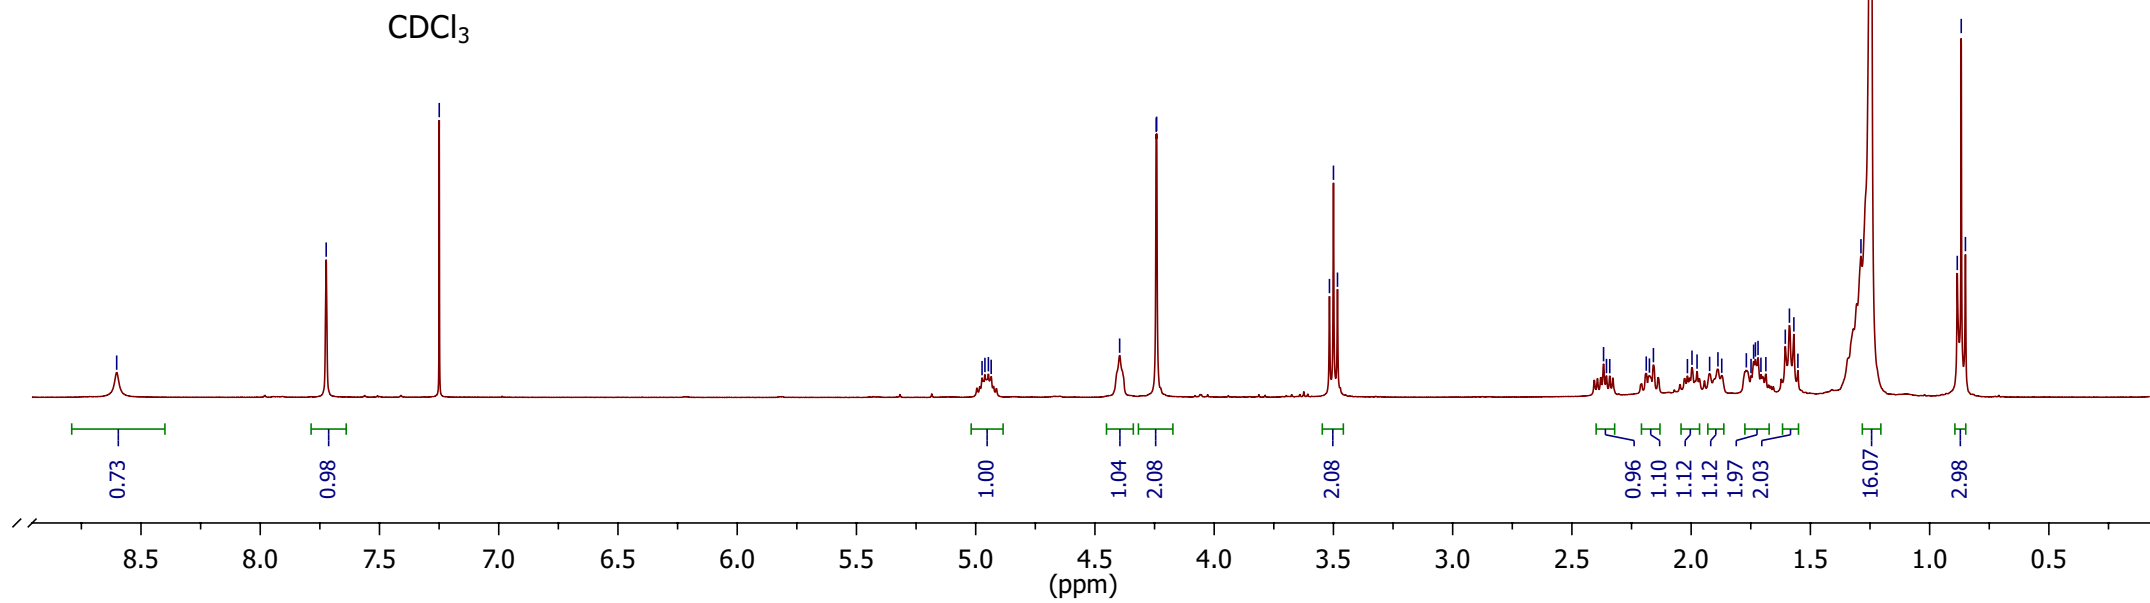

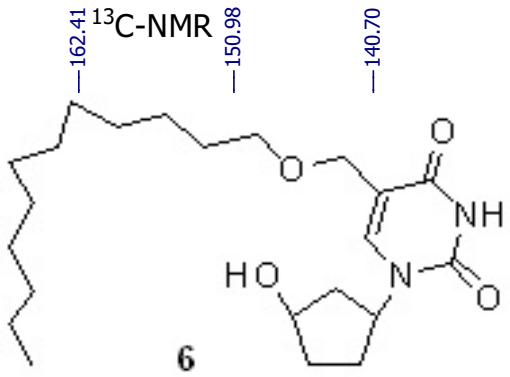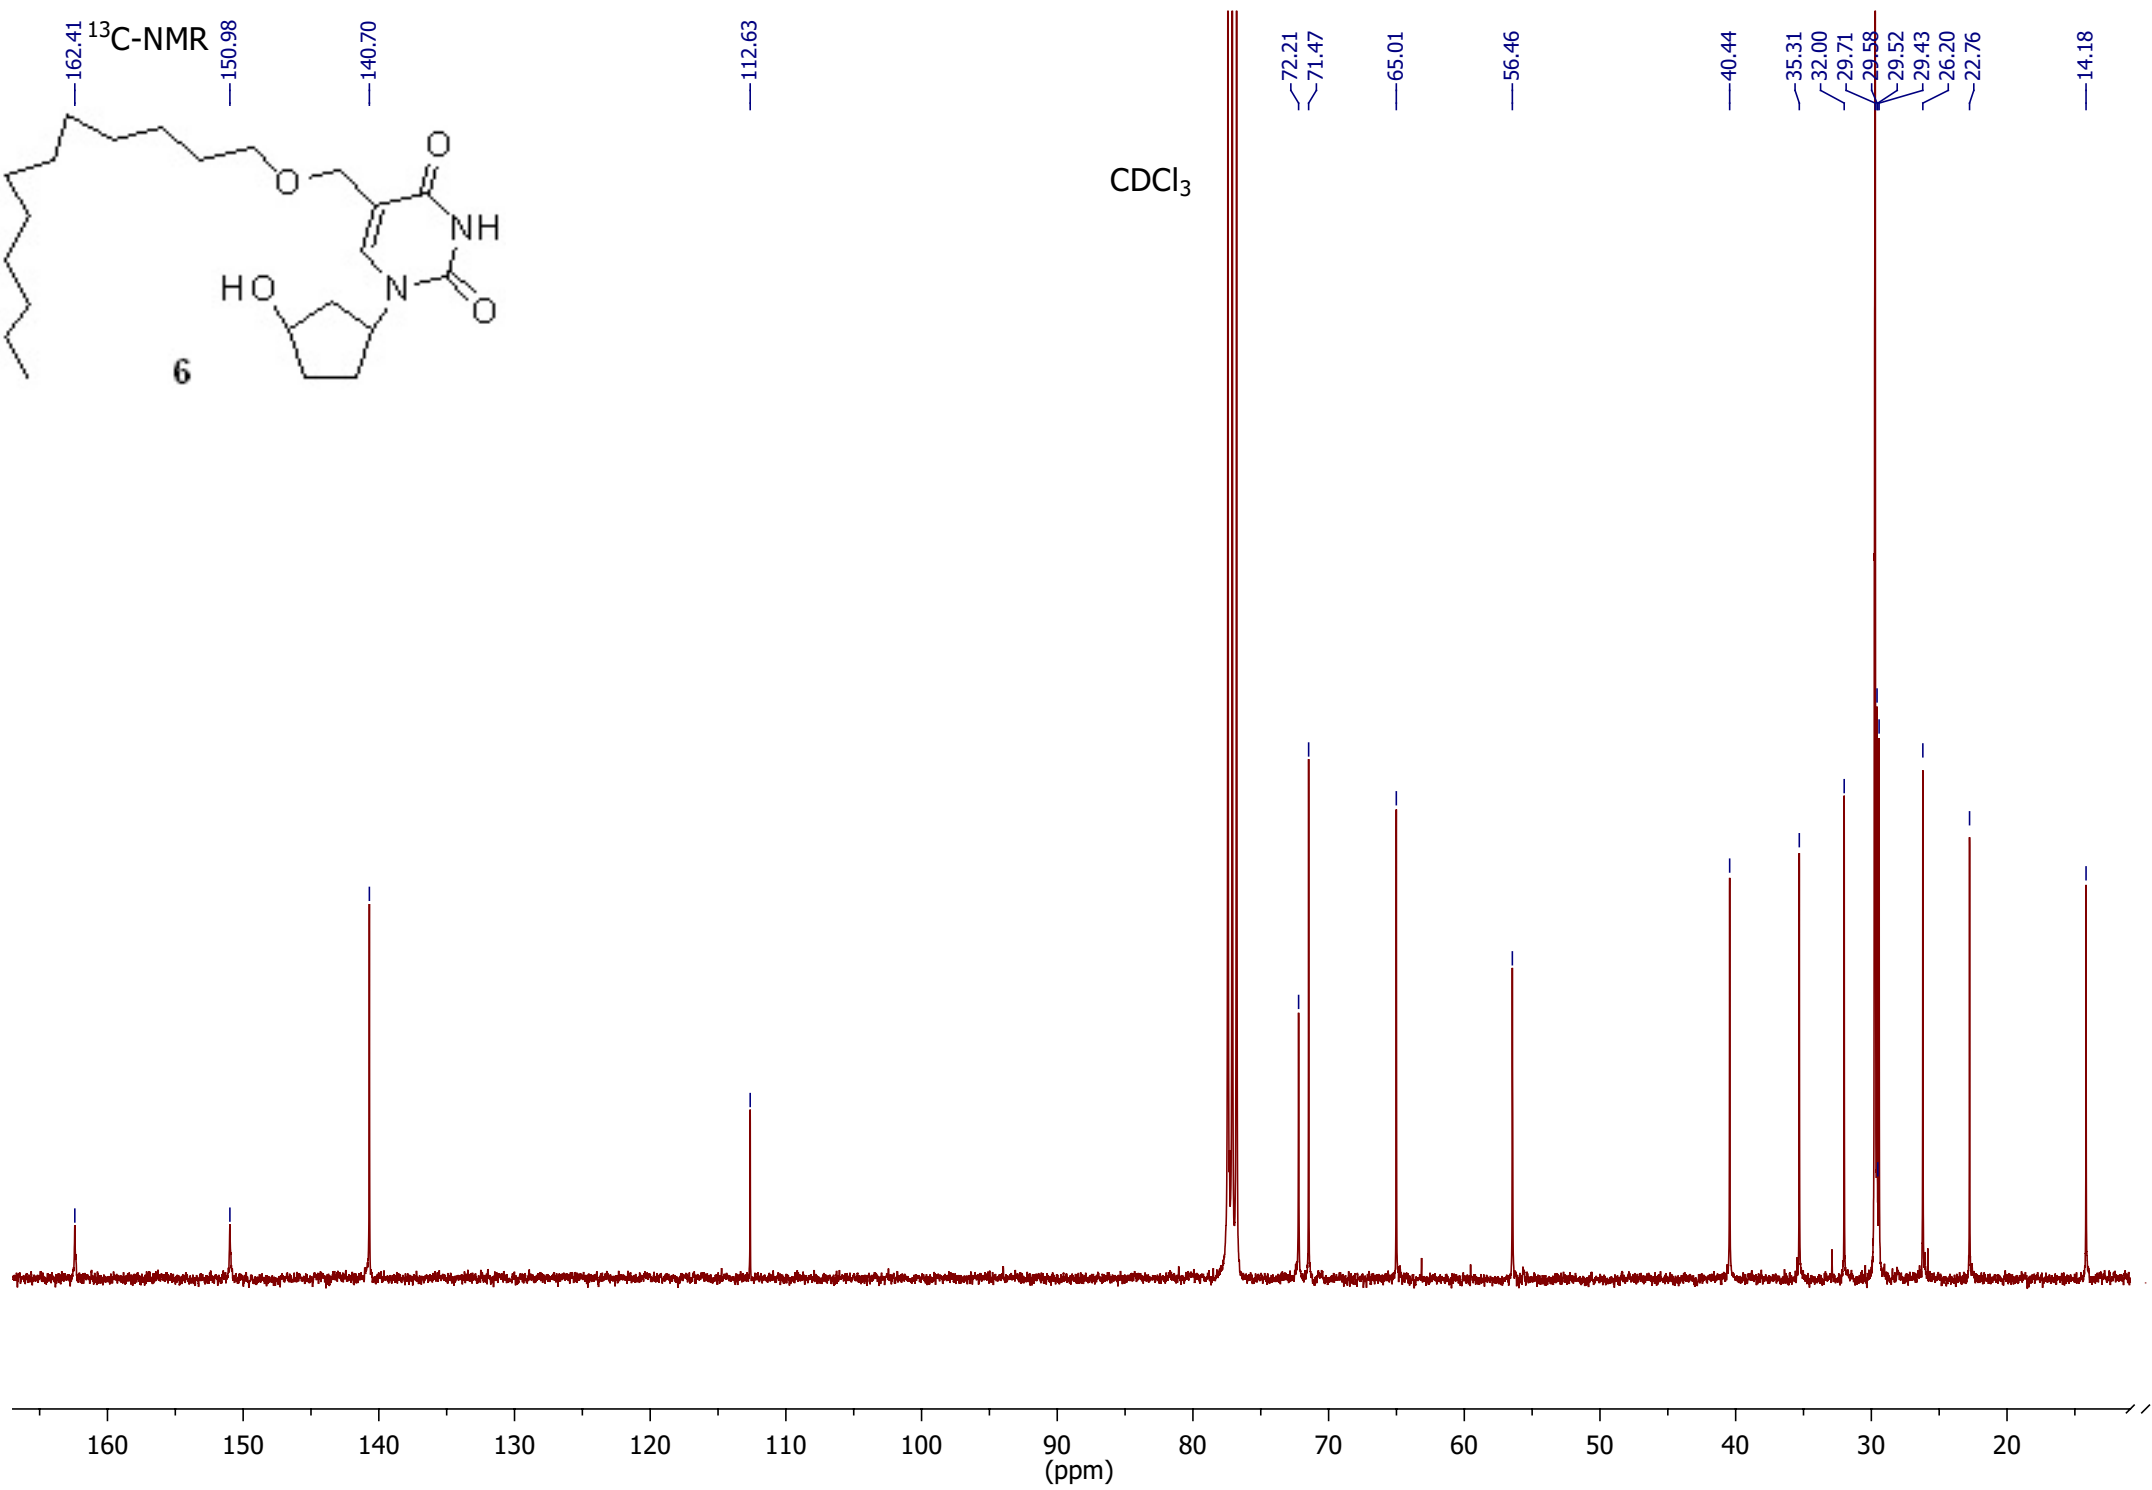

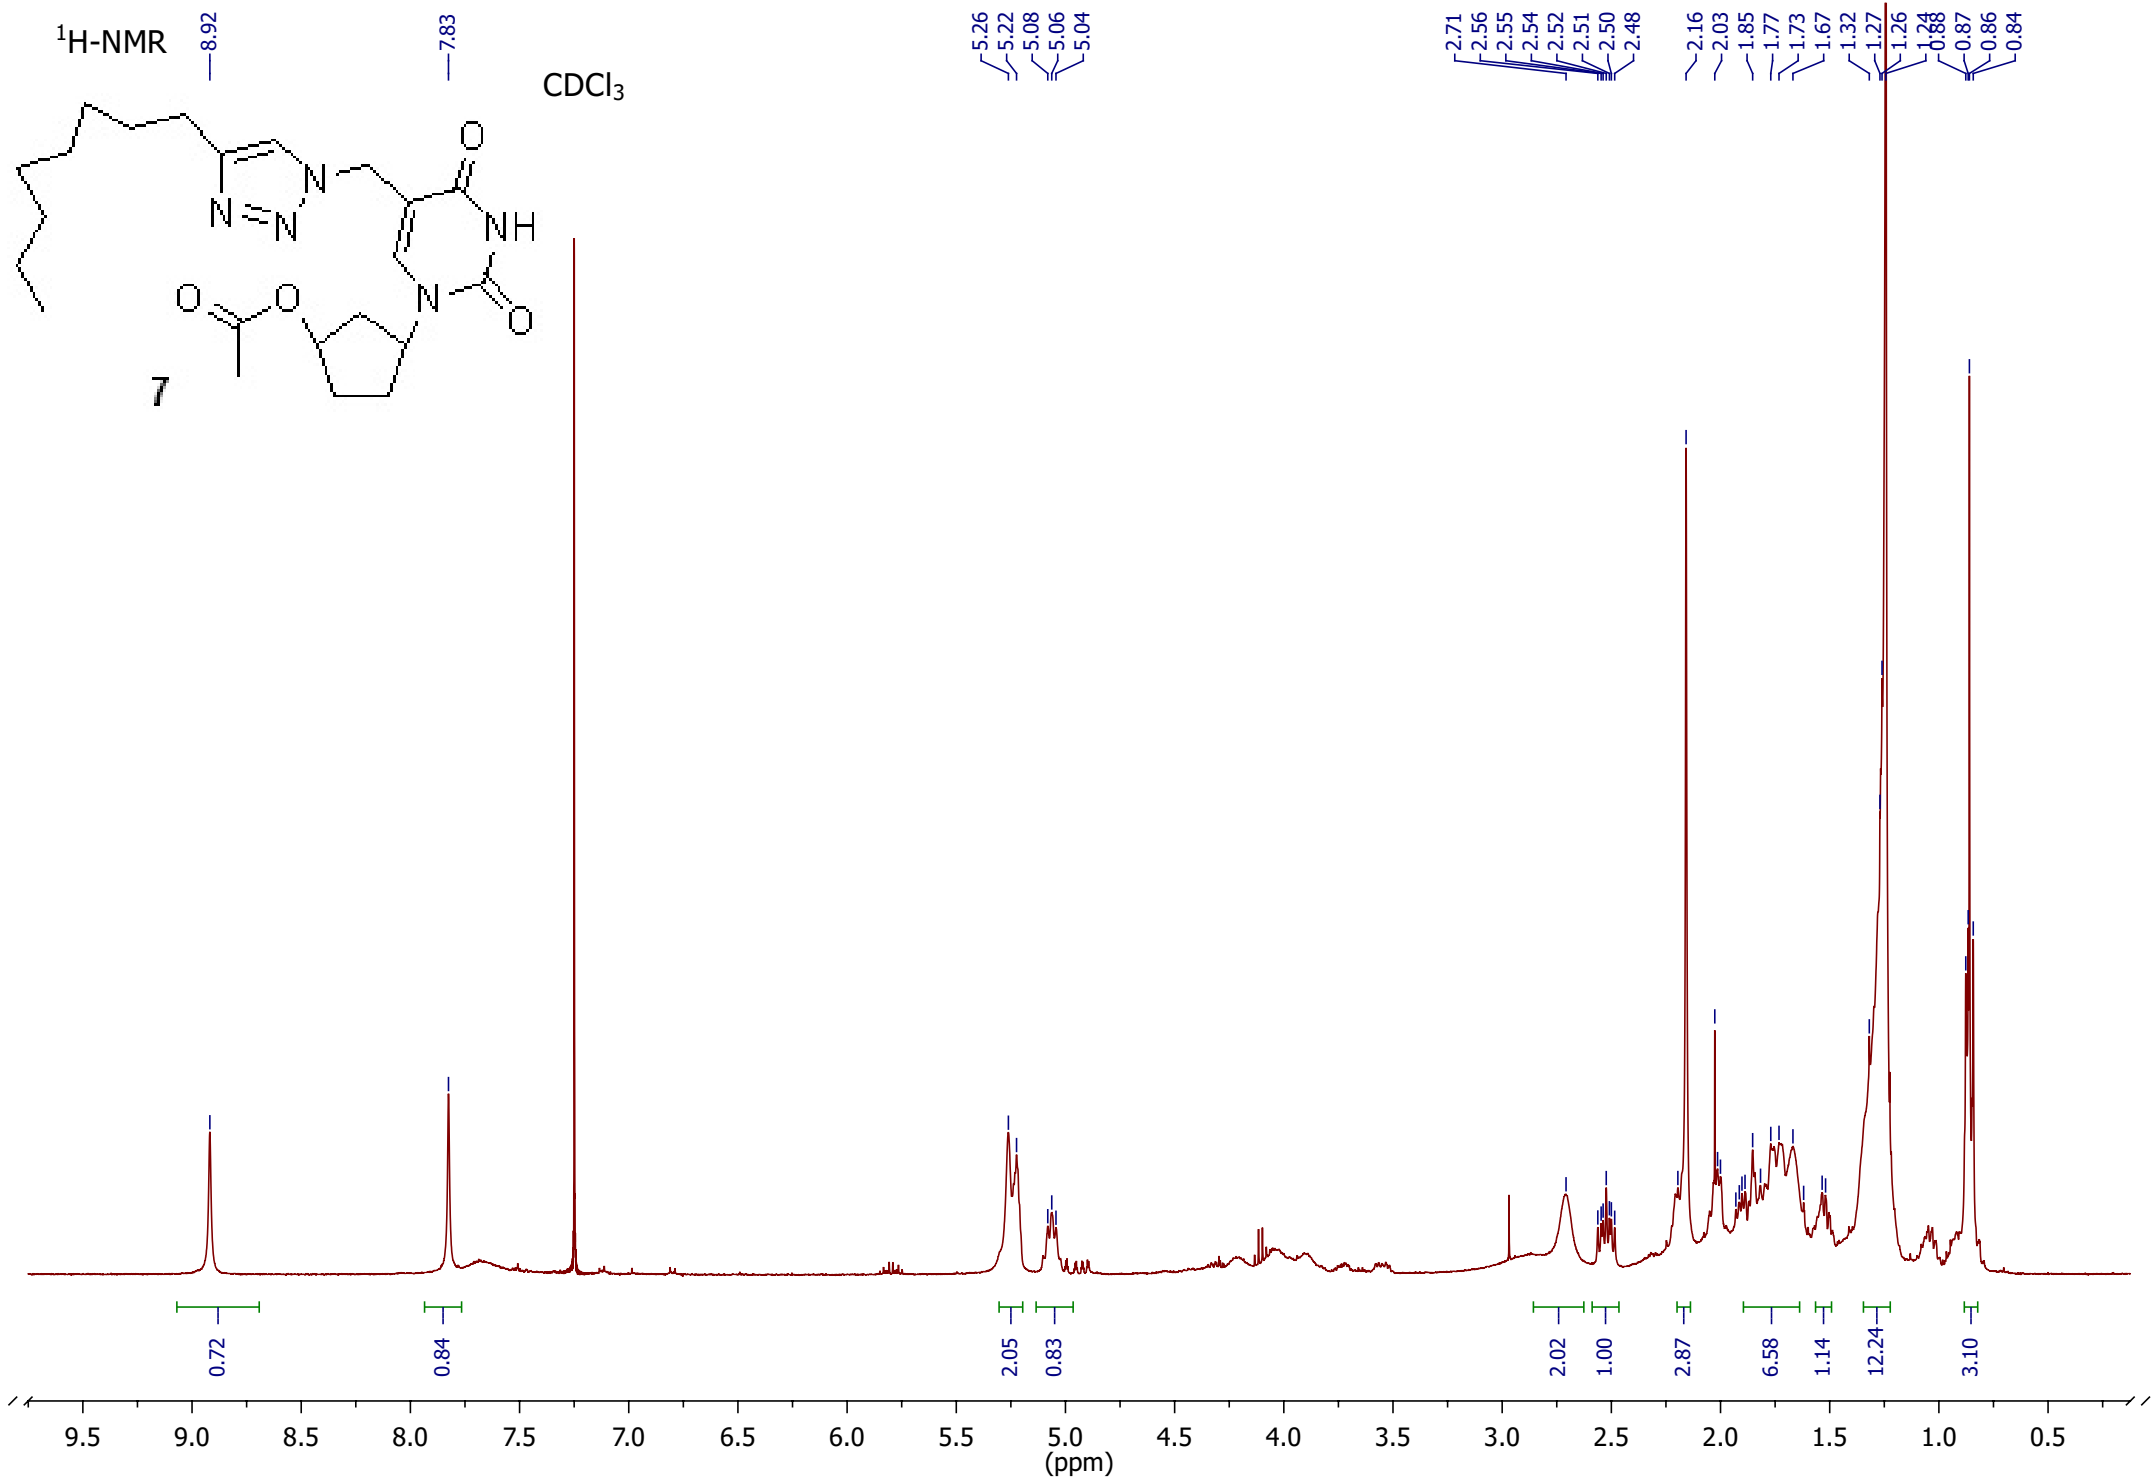

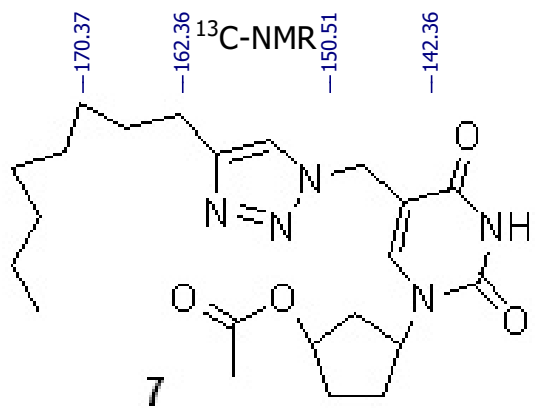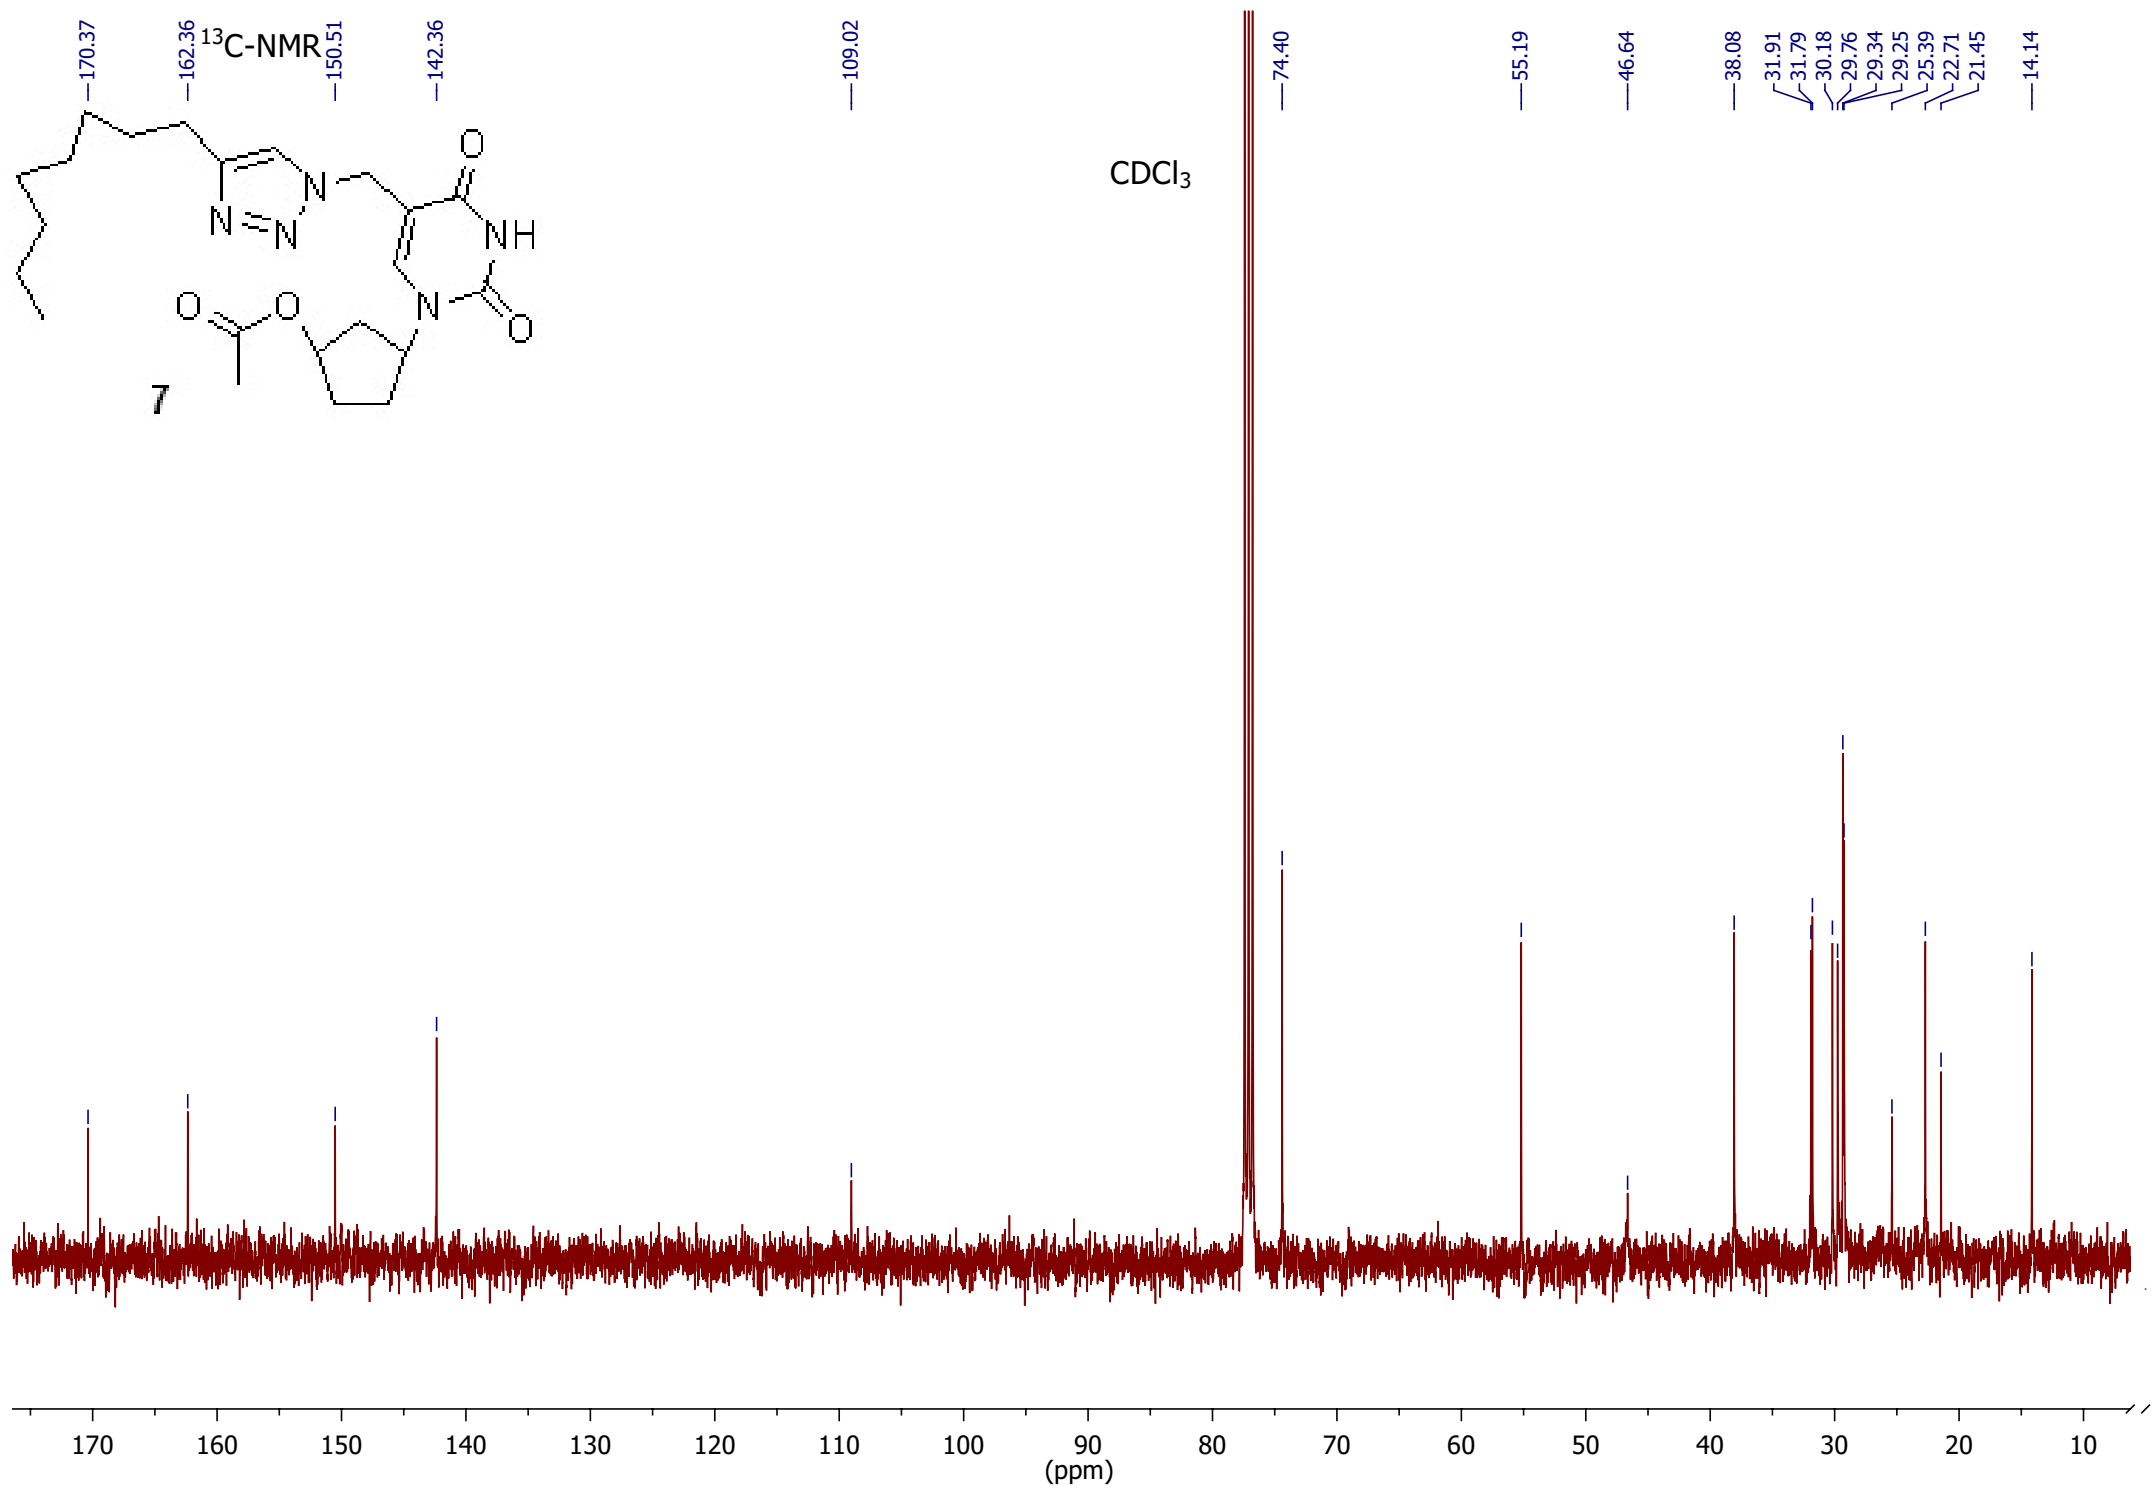

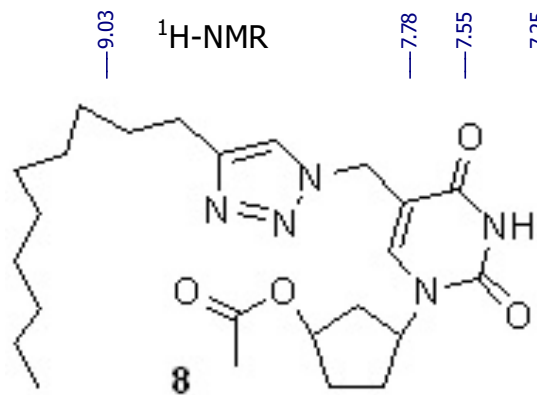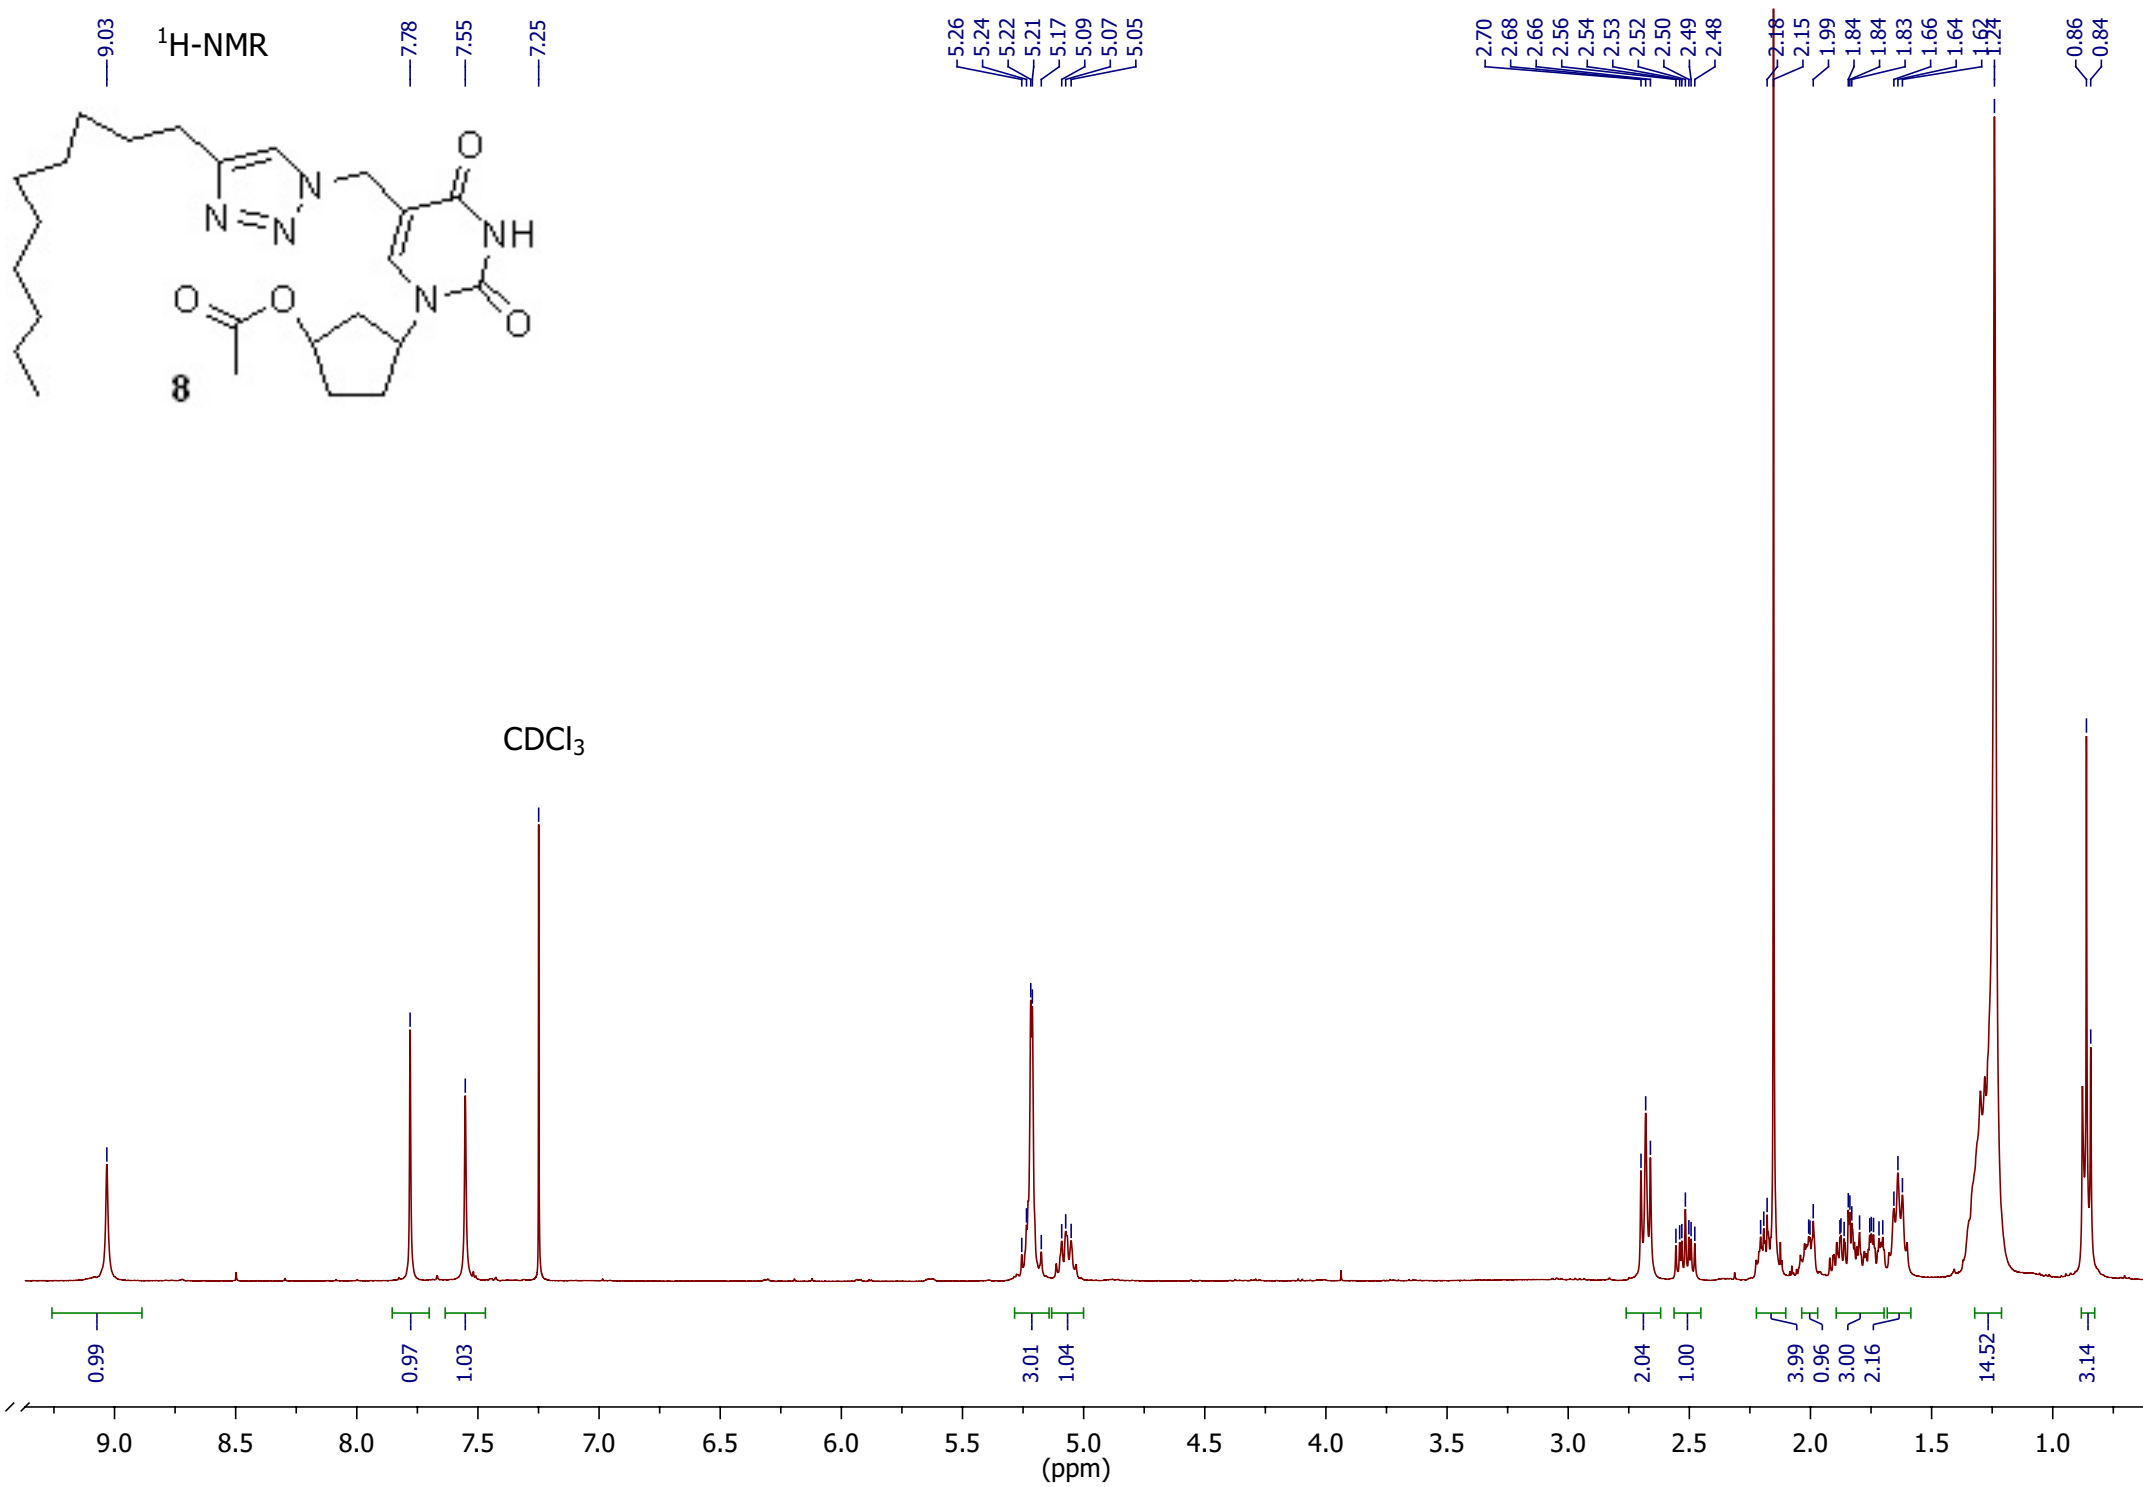



<sup>13</sup>C-NMR

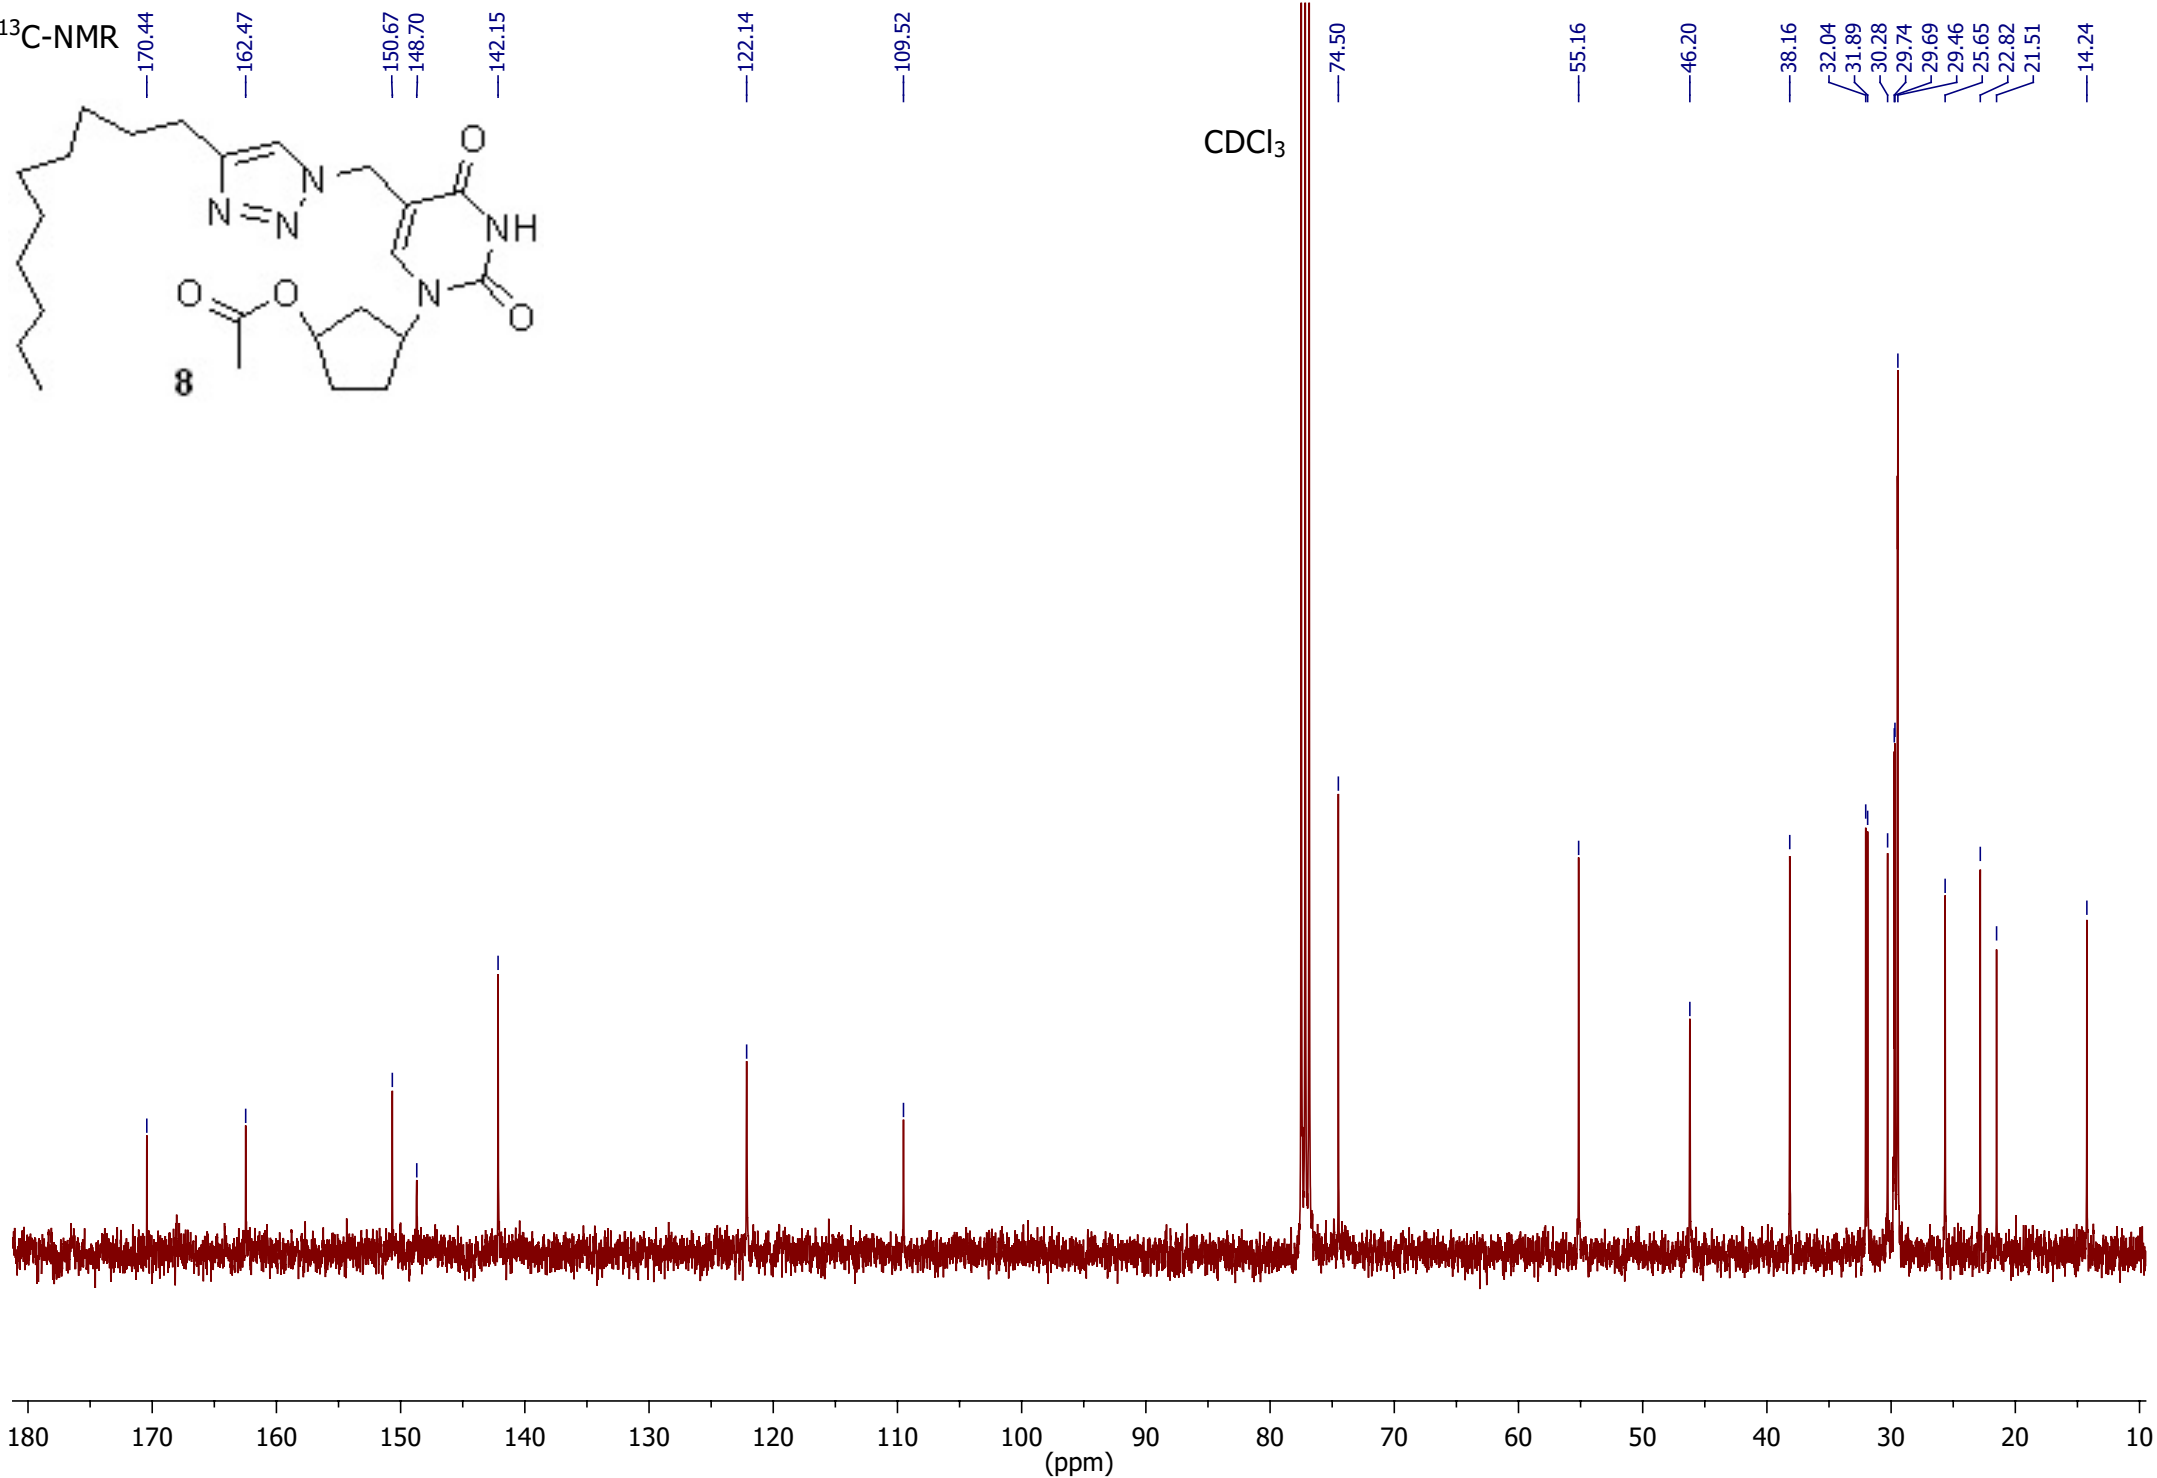

<sup>1</sup>H-NMR

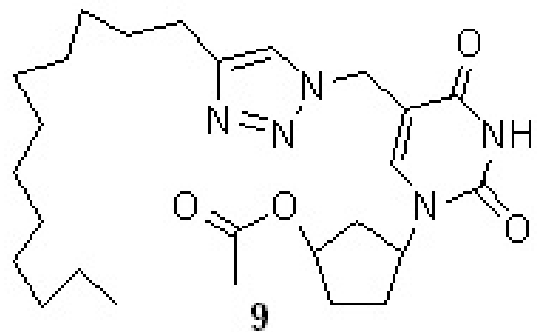

9.30

7.78

7.55

7.25

5.21  
5.09  
5.07  
5.05

4.11  
4.09  
4.07

2.69  
2.67  
2.65  
2.55  
2.53  
2.52  
2.51  
2.50  
2.49  
2.47

2.17  
2.15  
2.08  
2.02  
1.93  
1.63  
1.61

1.25  
1.24  
0.87  
0.86  
0.84

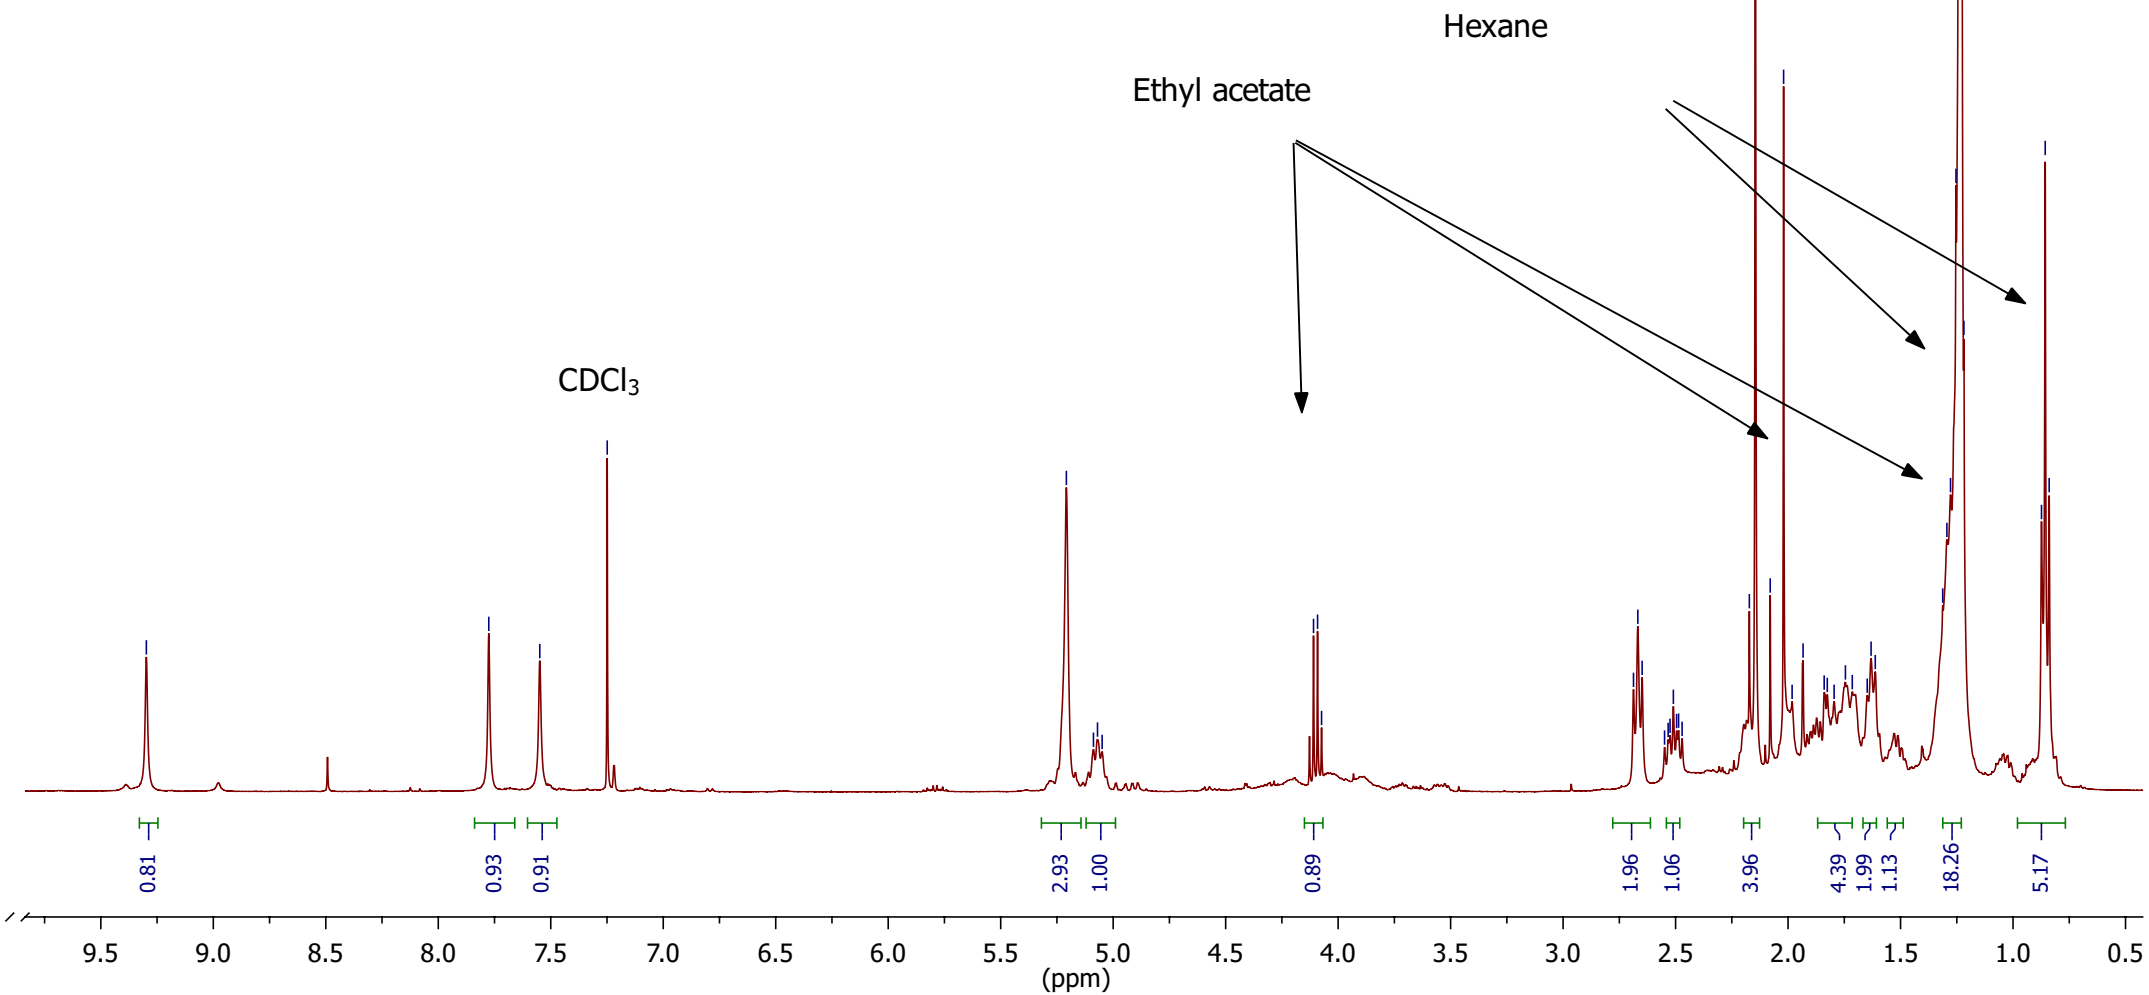

<sup>13</sup>C-NMR

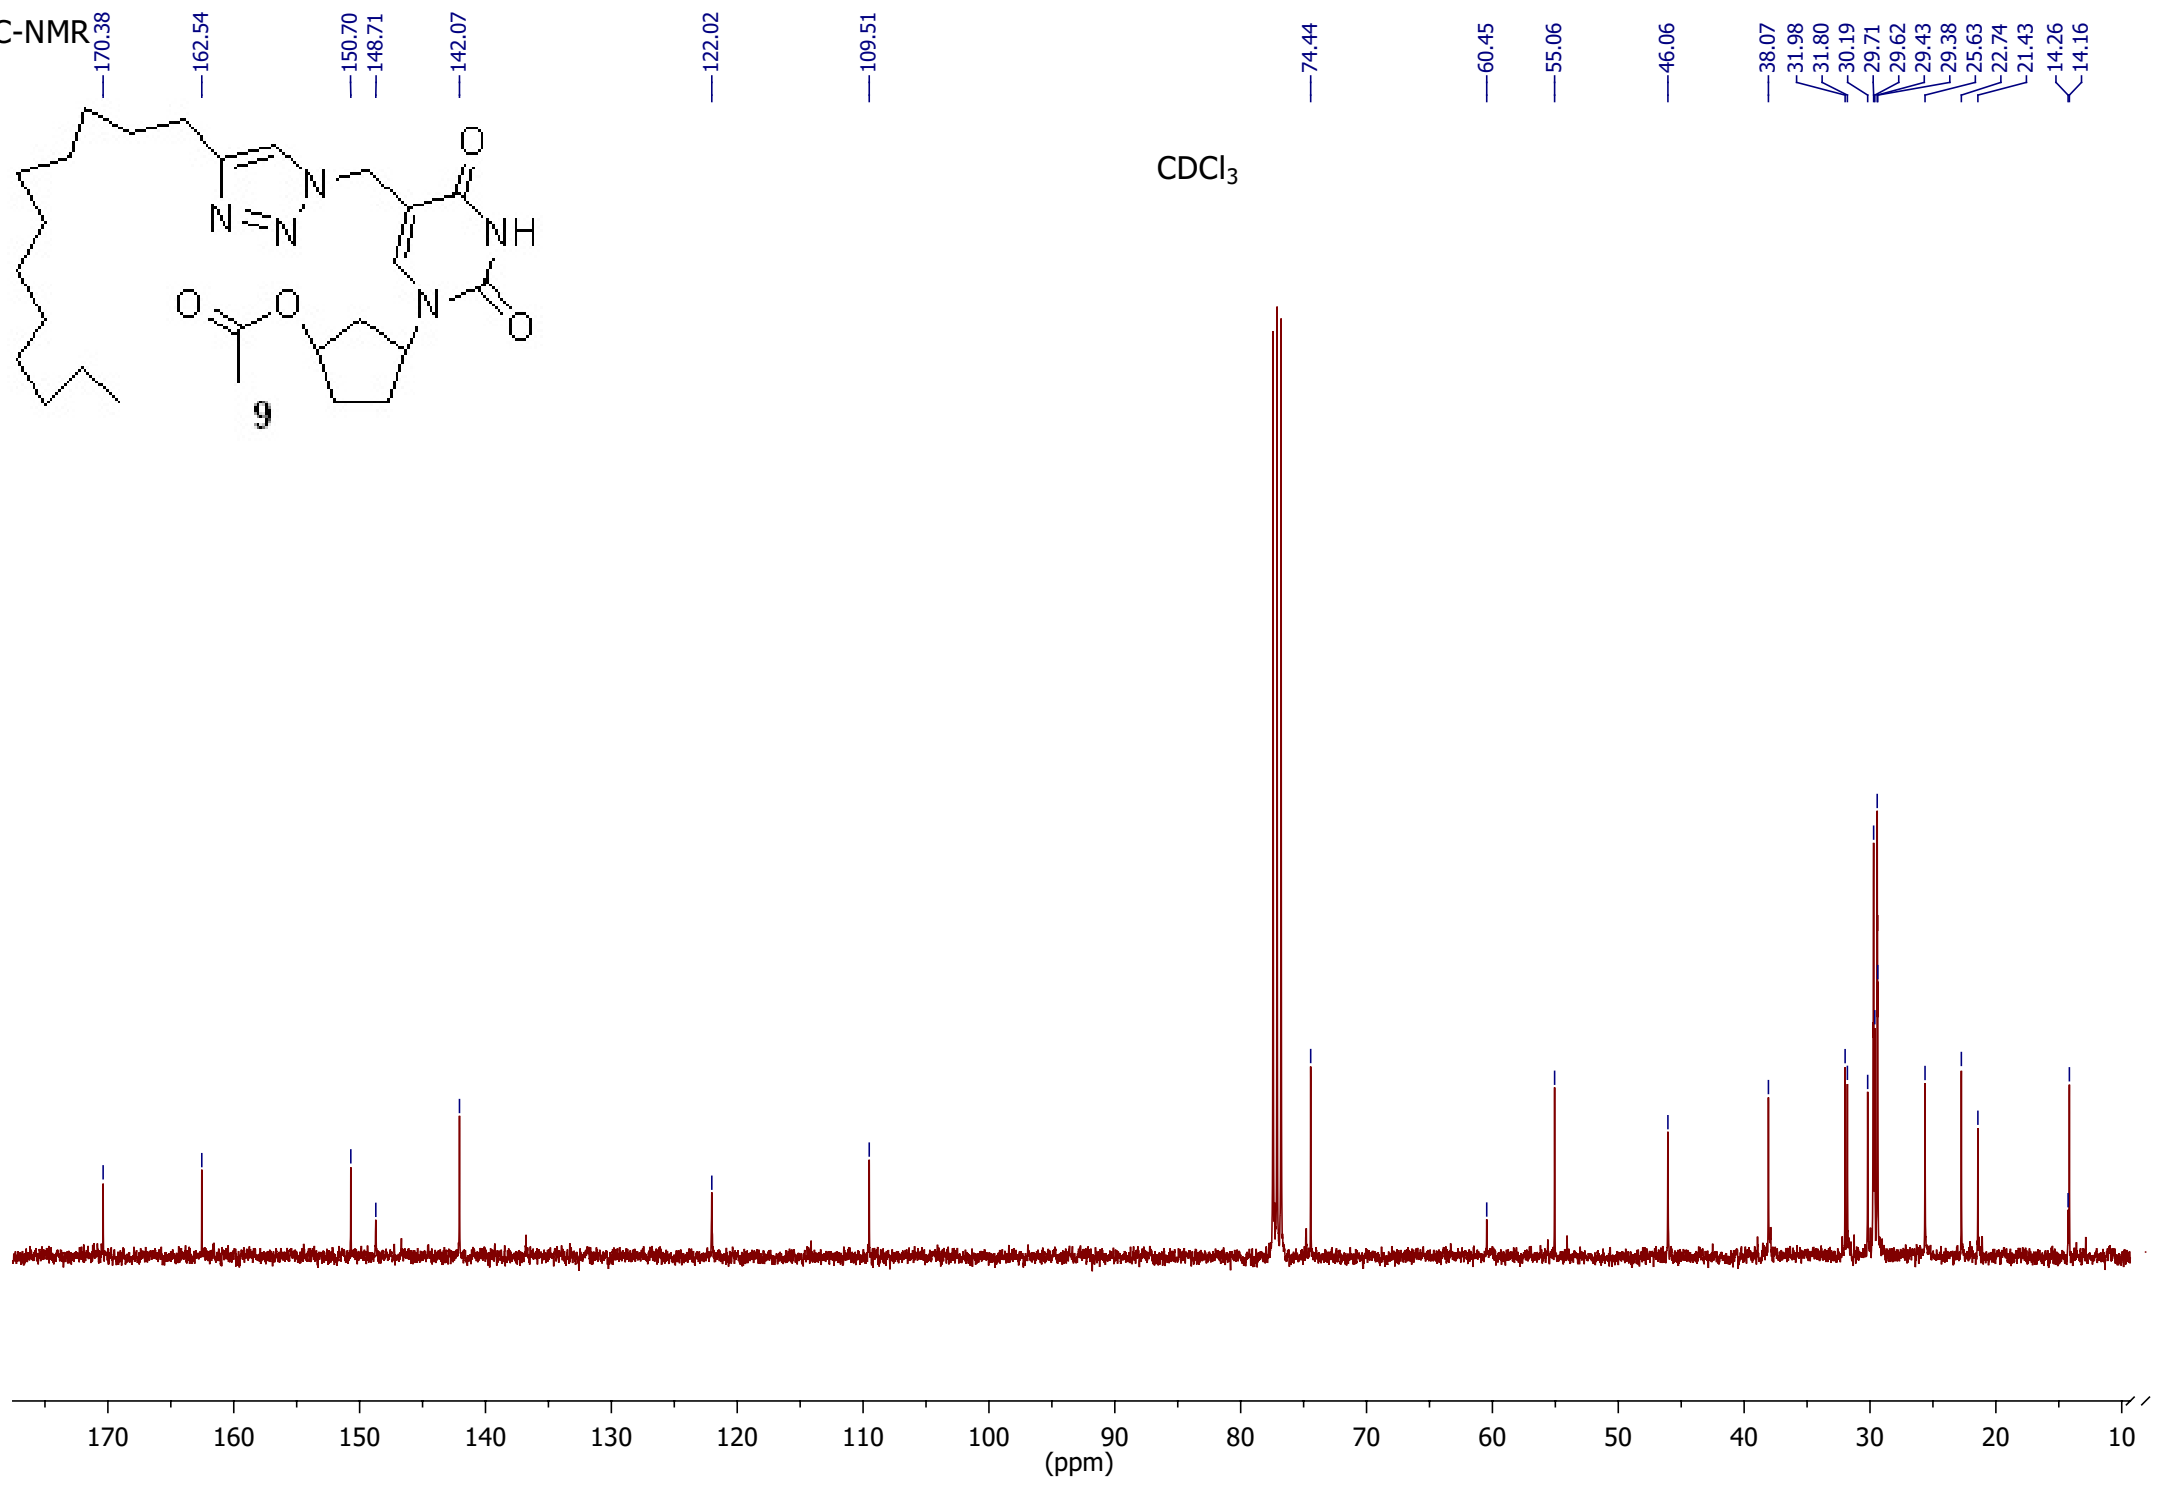

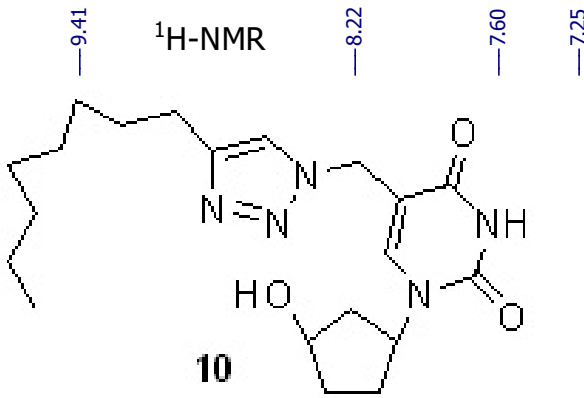

5.28 5.24 5.23 5.19 5.11 5.09 4.40 3.29 2.69 2.67 2.65 2.61 2.30 2.23 2.20 1.90 1.76 1.65 1.63 1.61 1.27 1.26 1.24 0.85 0.83

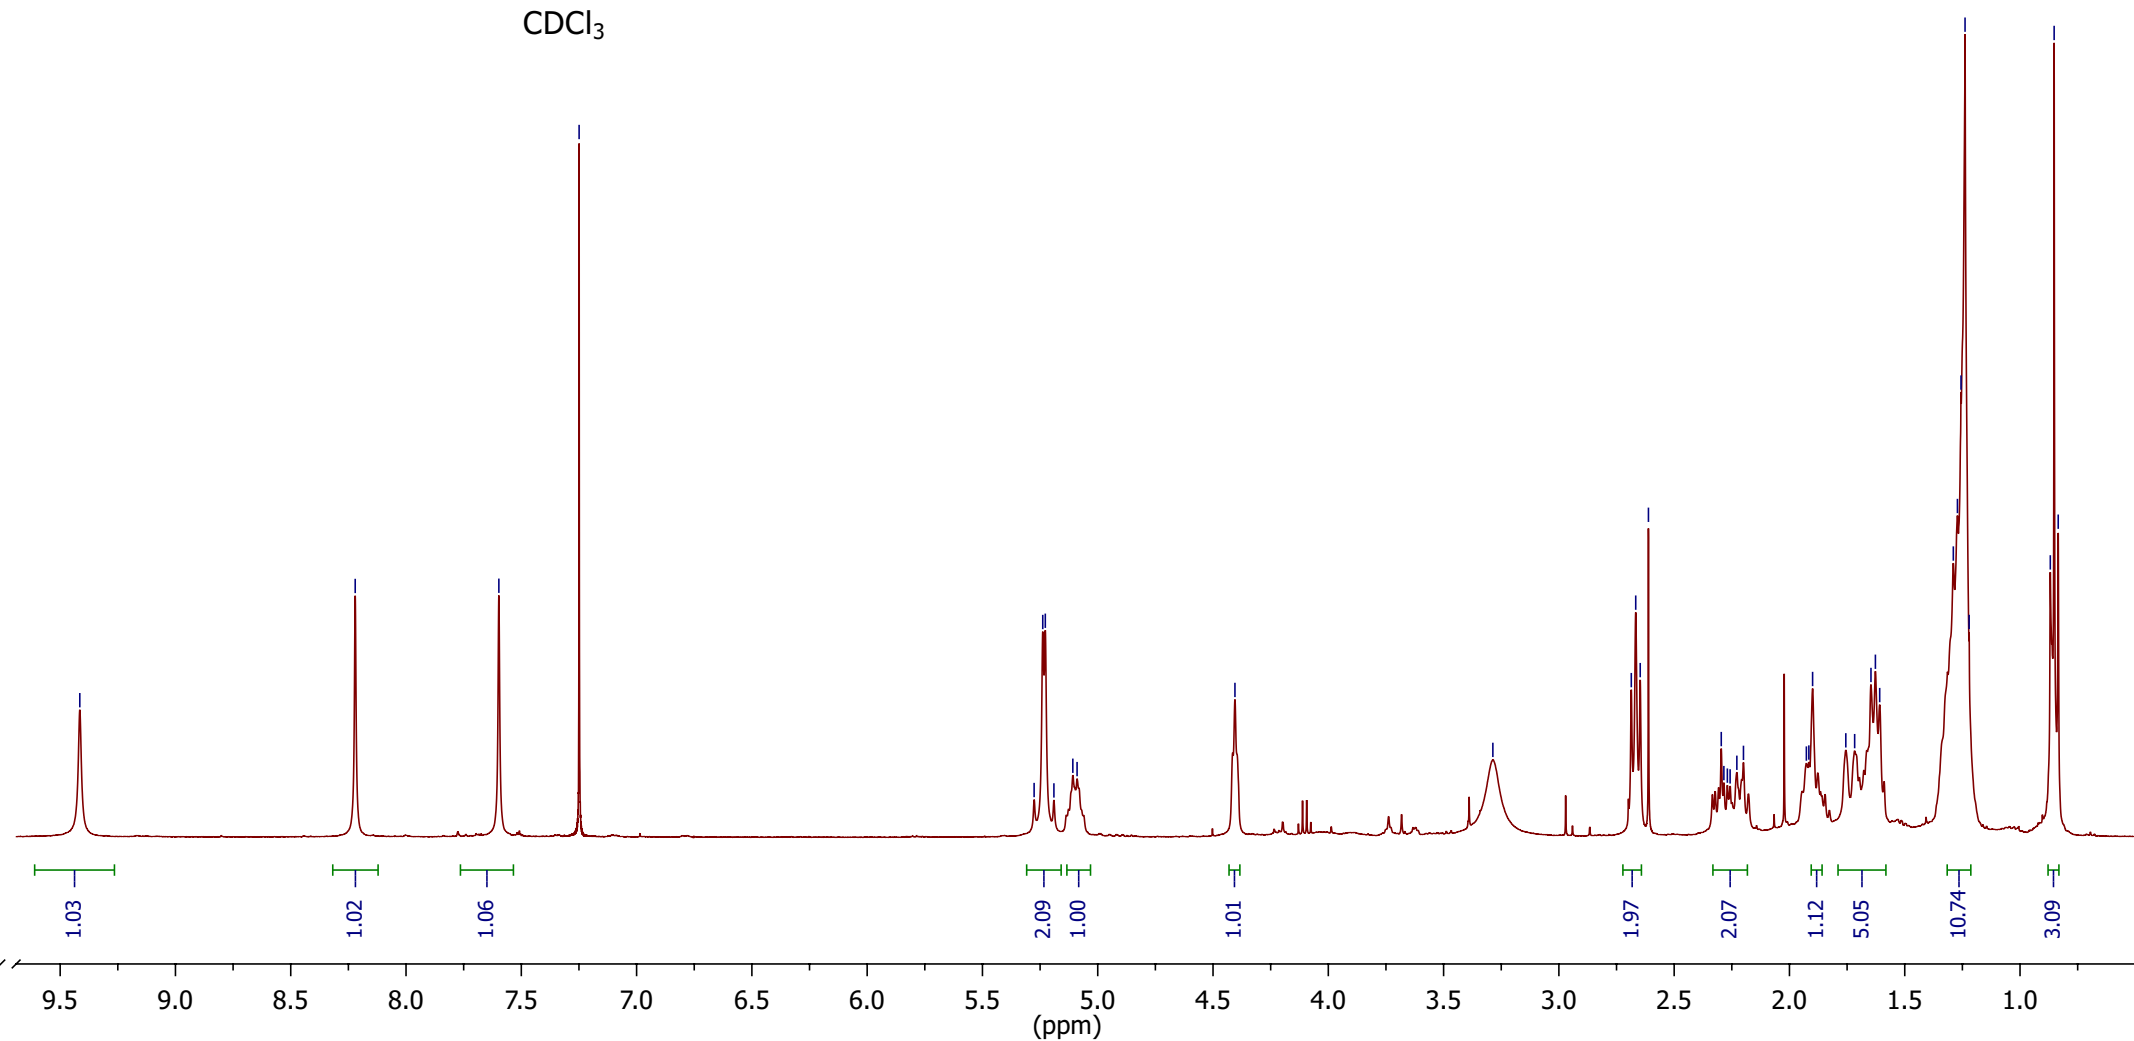

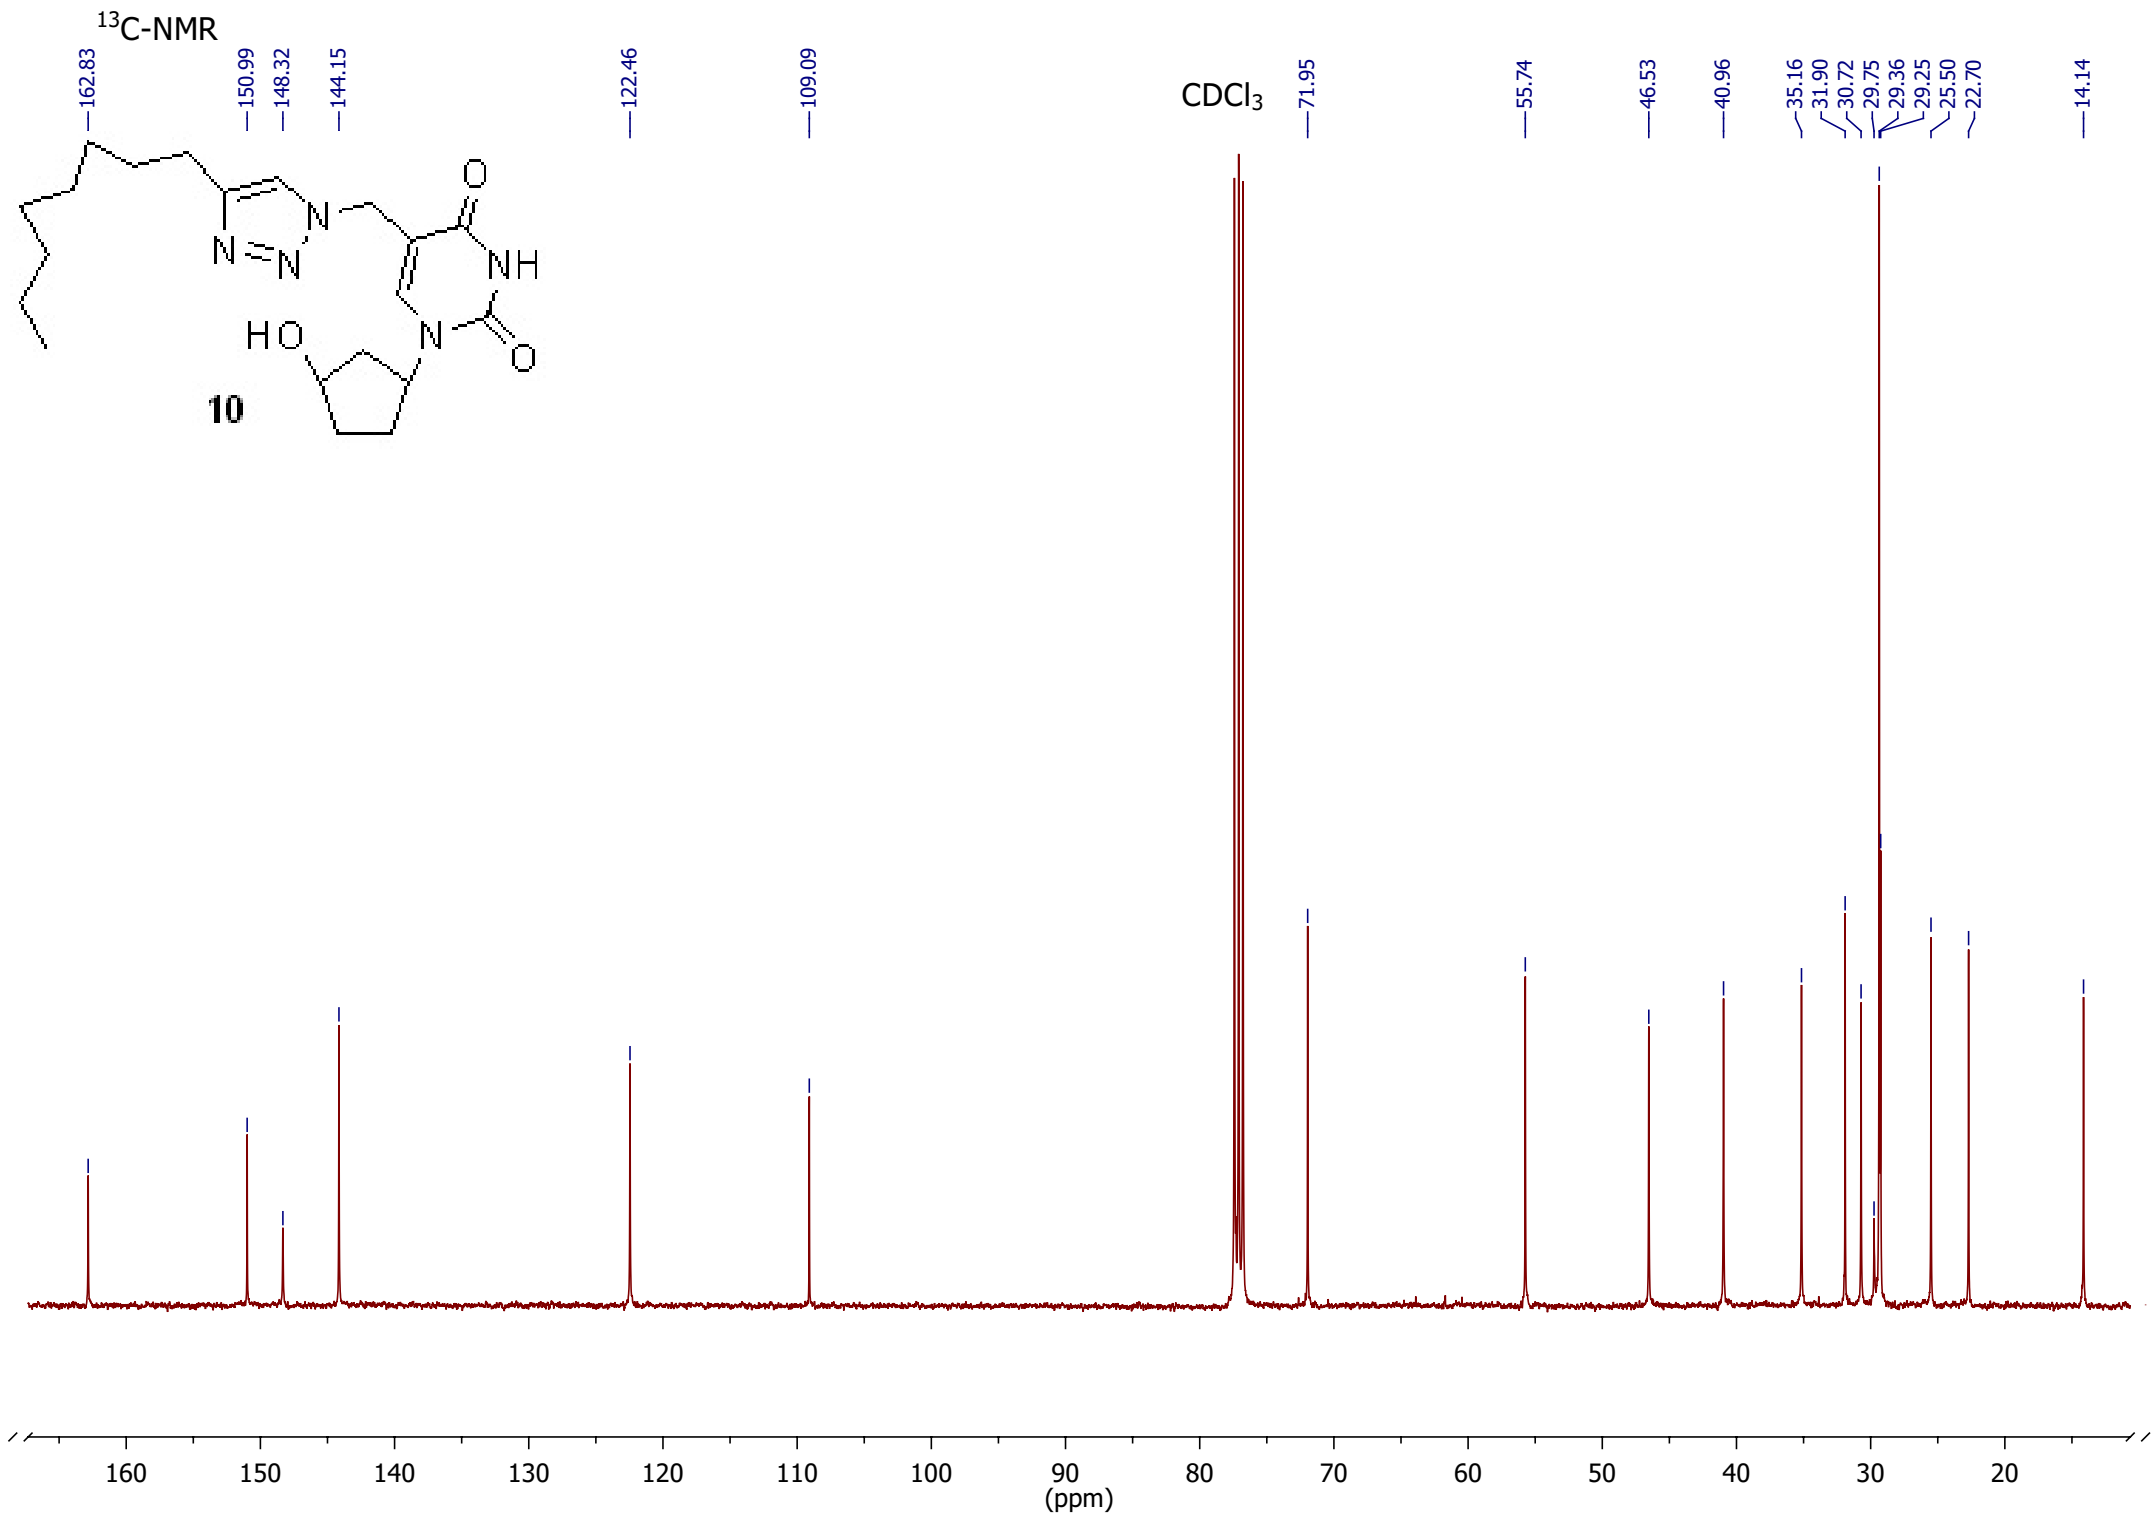

<sup>1</sup>H-NMR

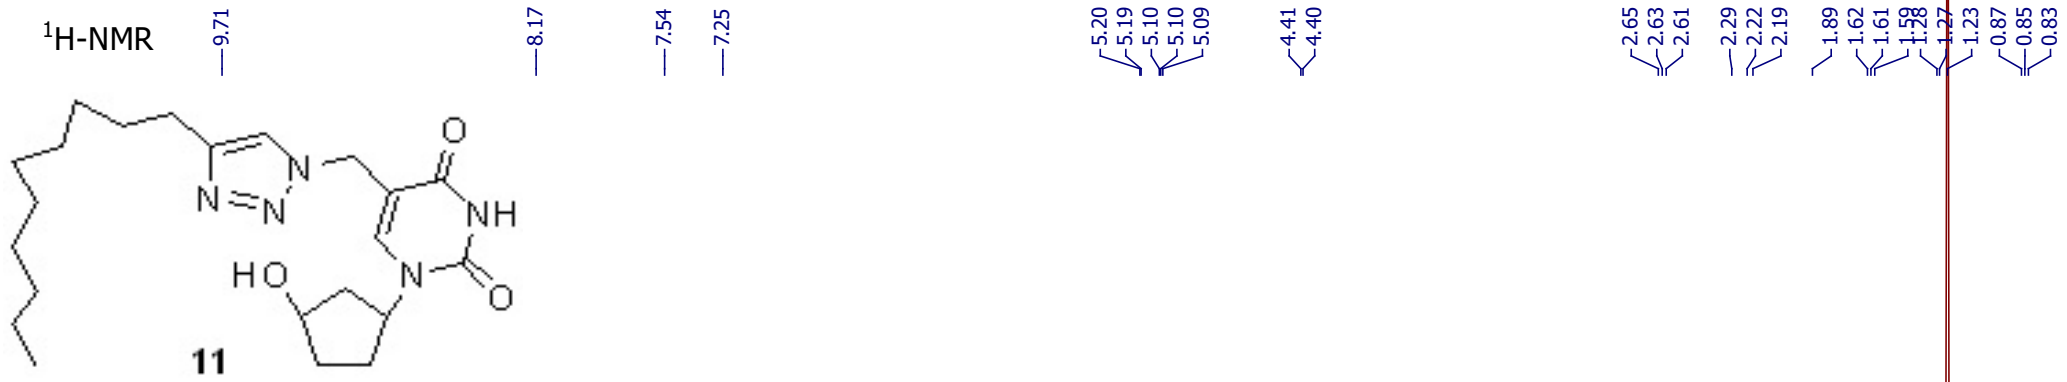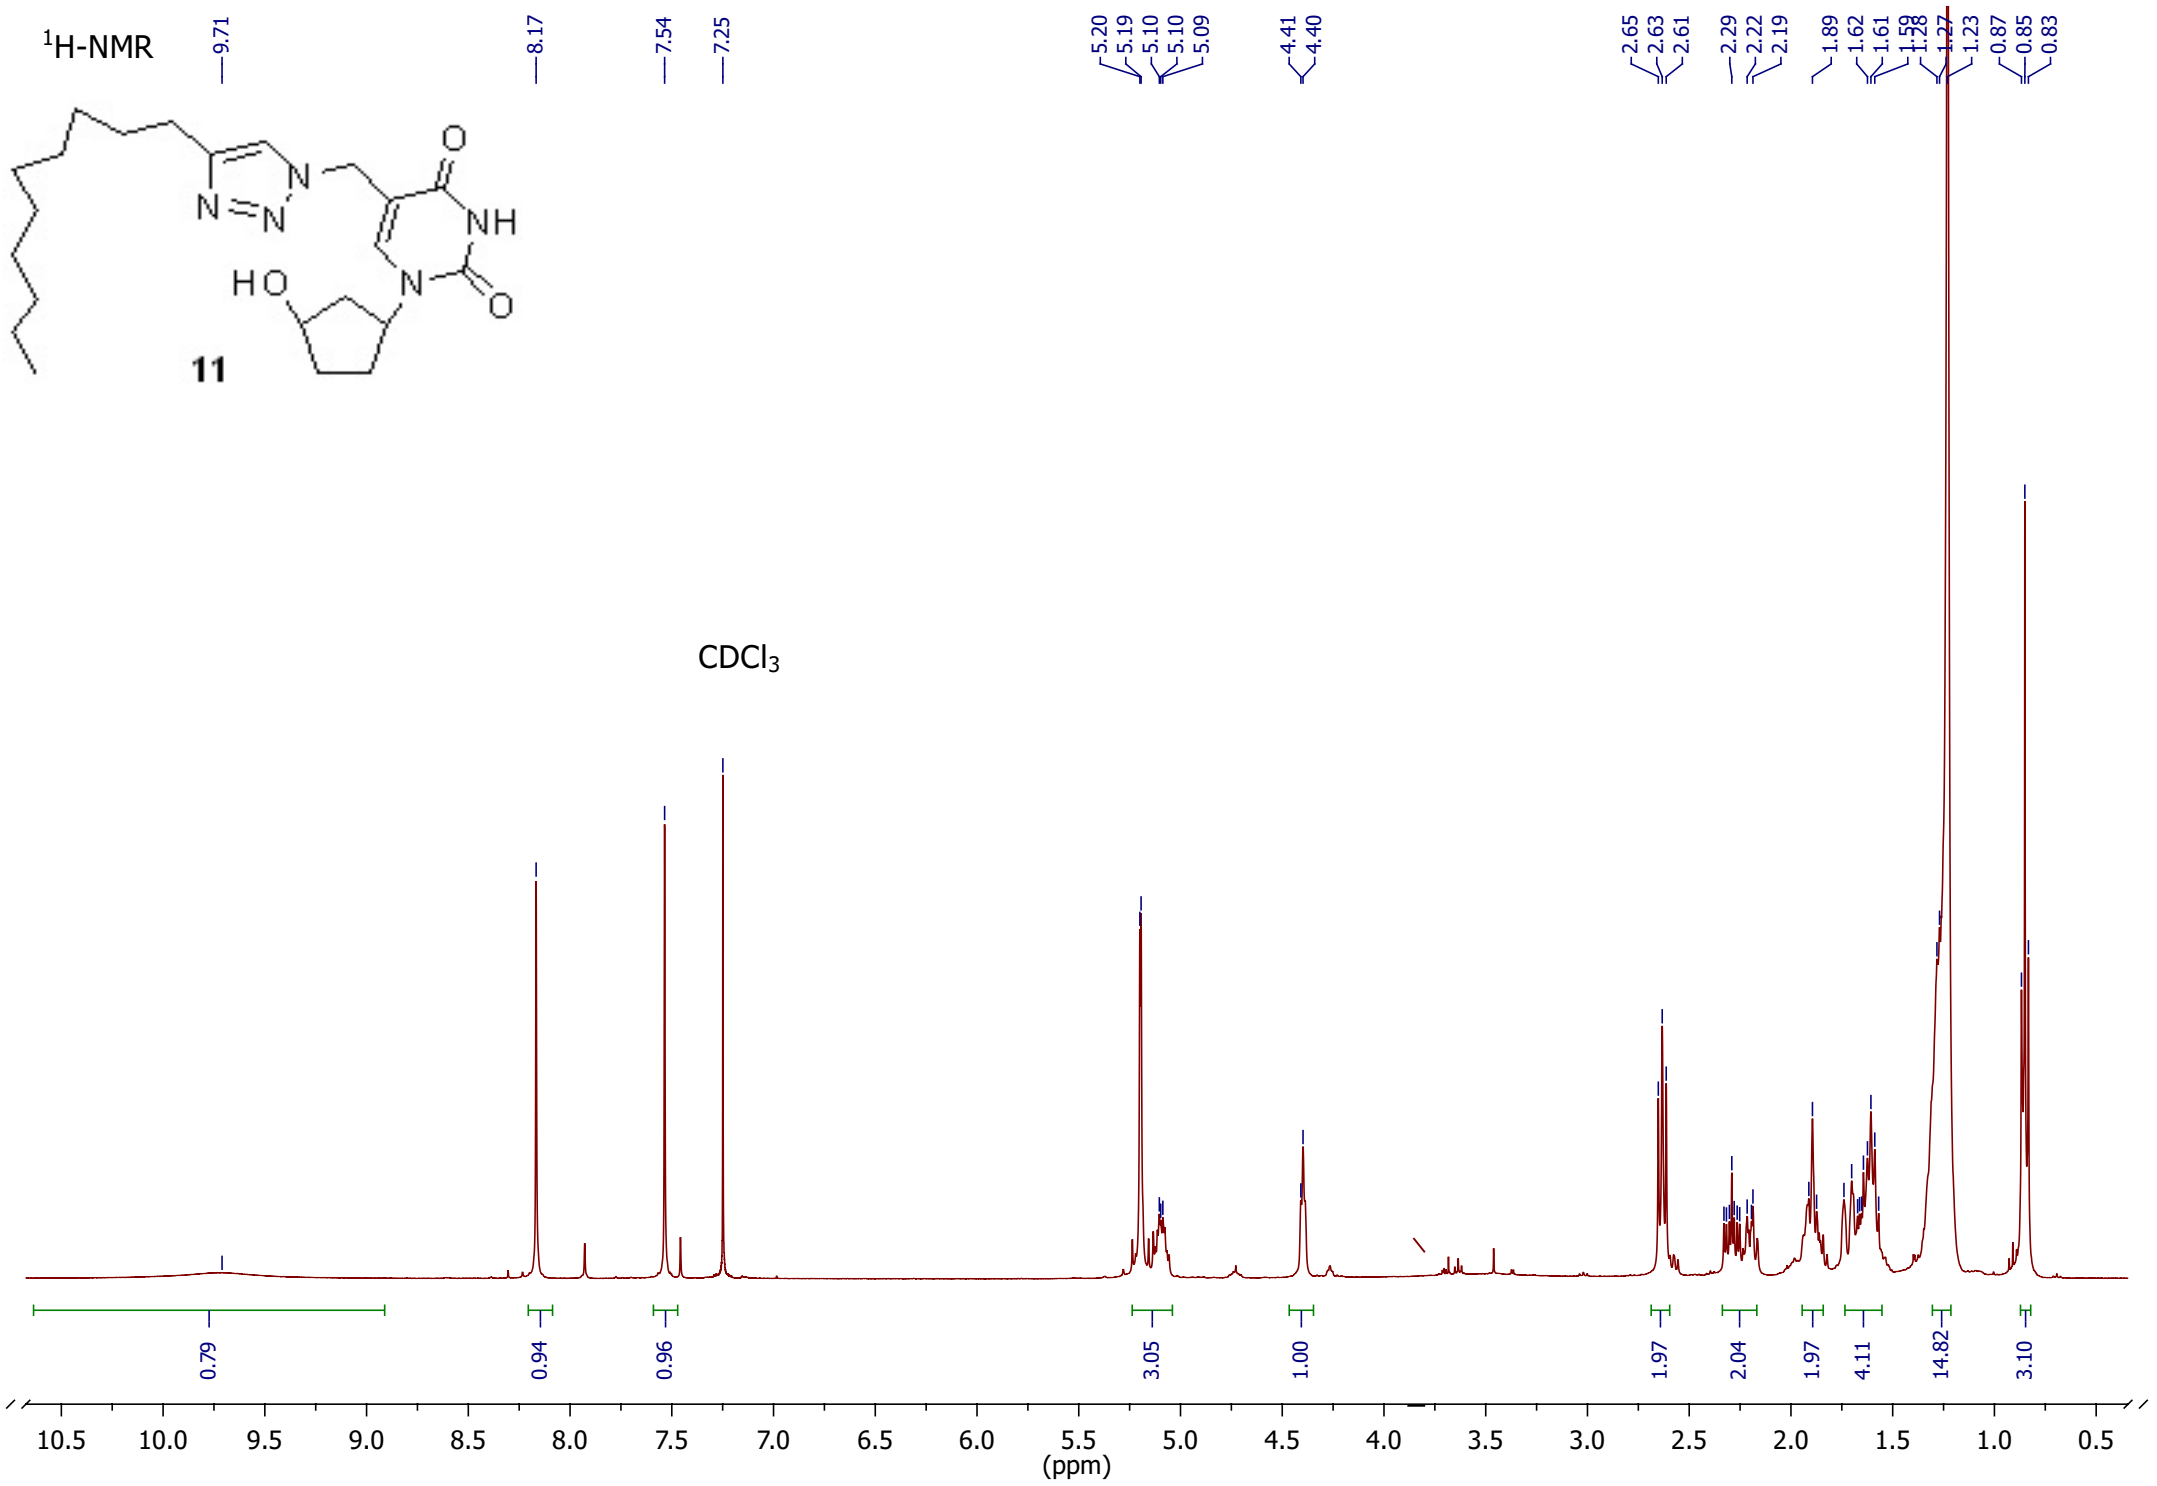

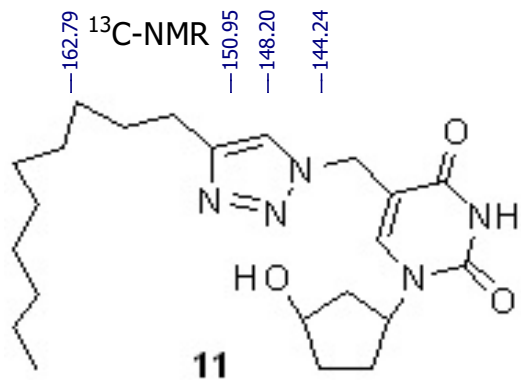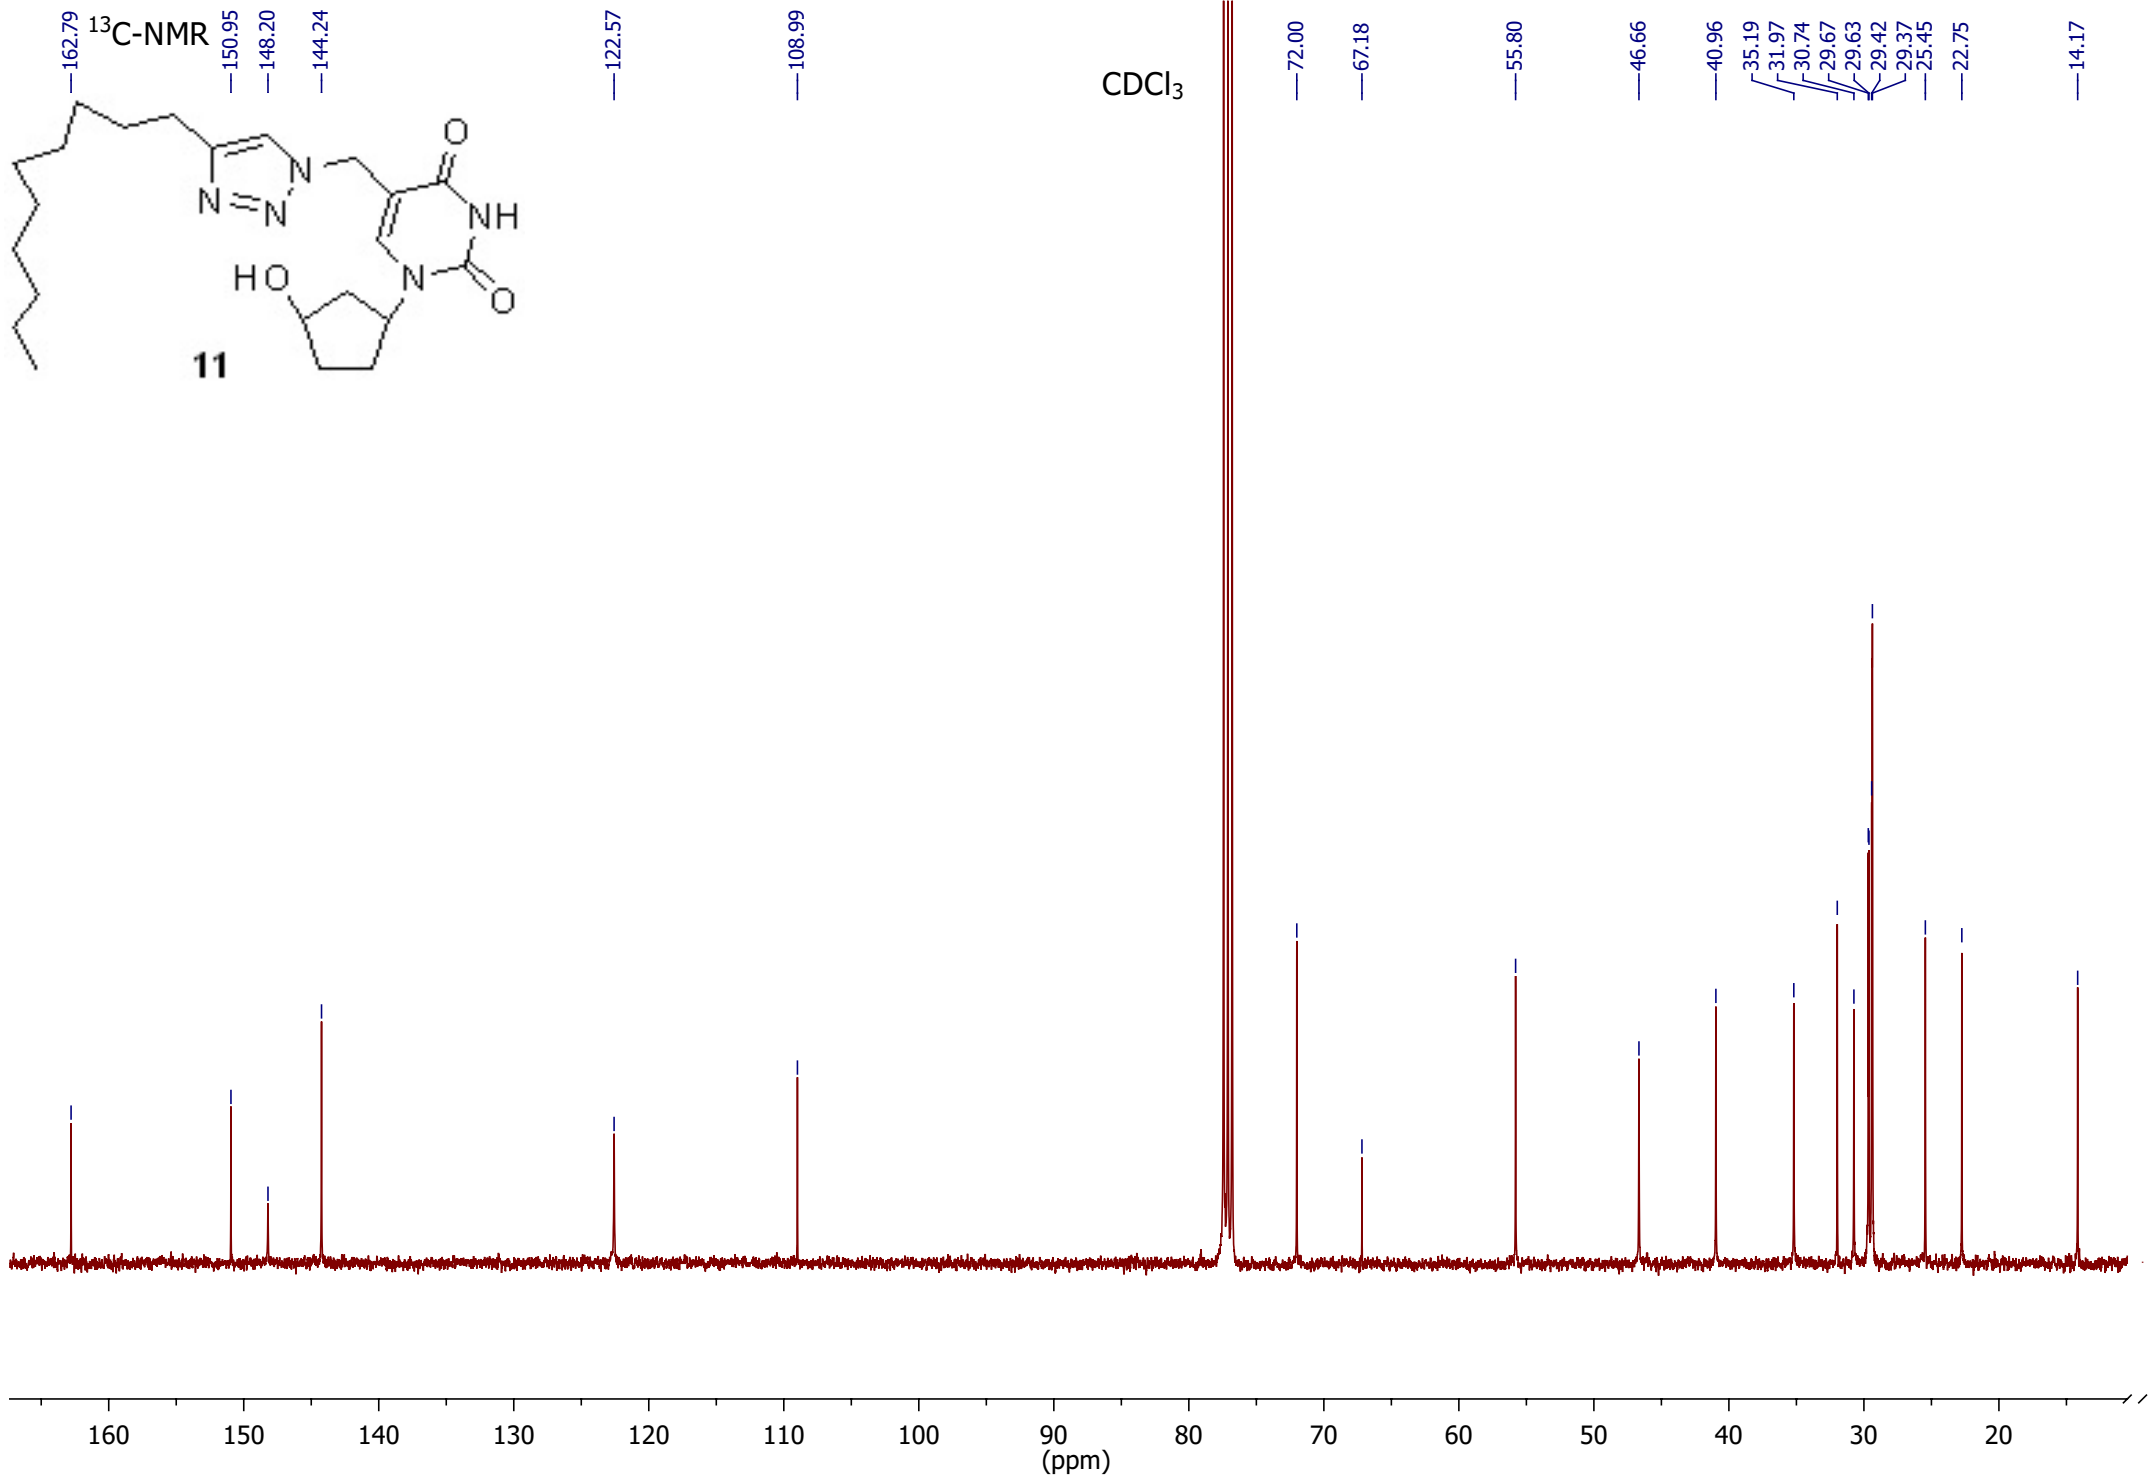

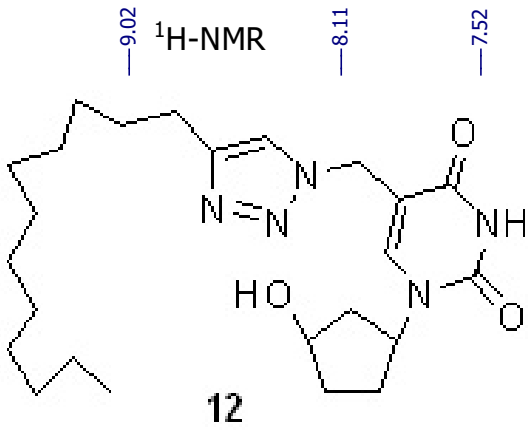

CDCl<sub>3</sub>

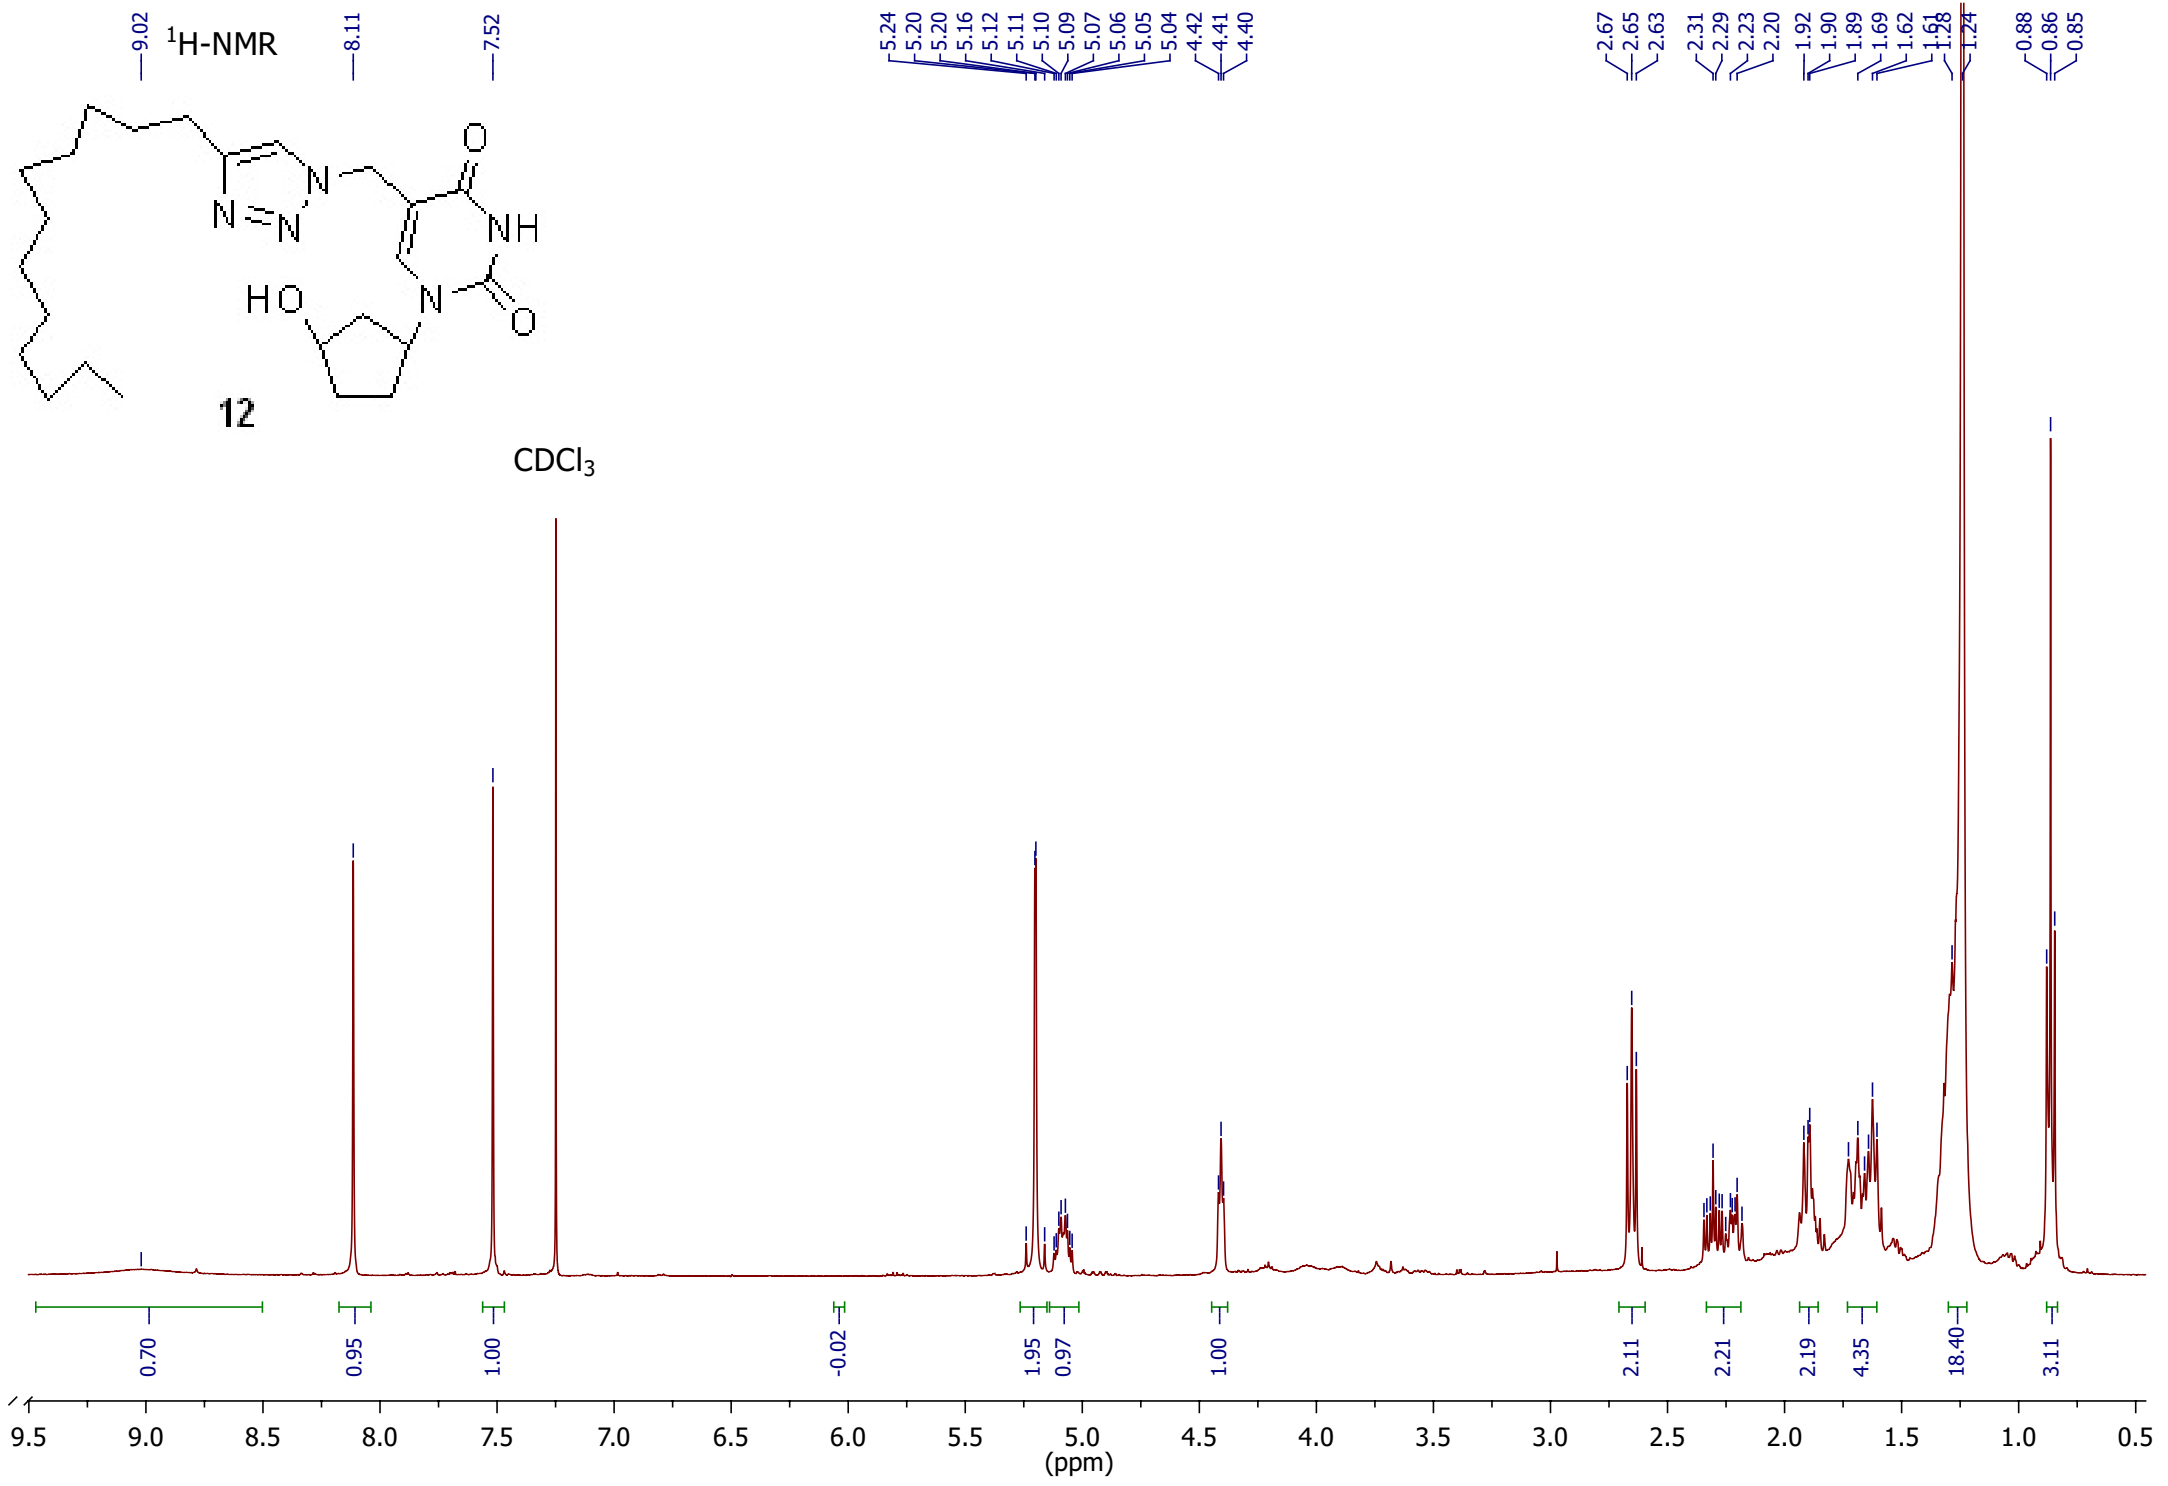



<sup>13</sup>C-NMR

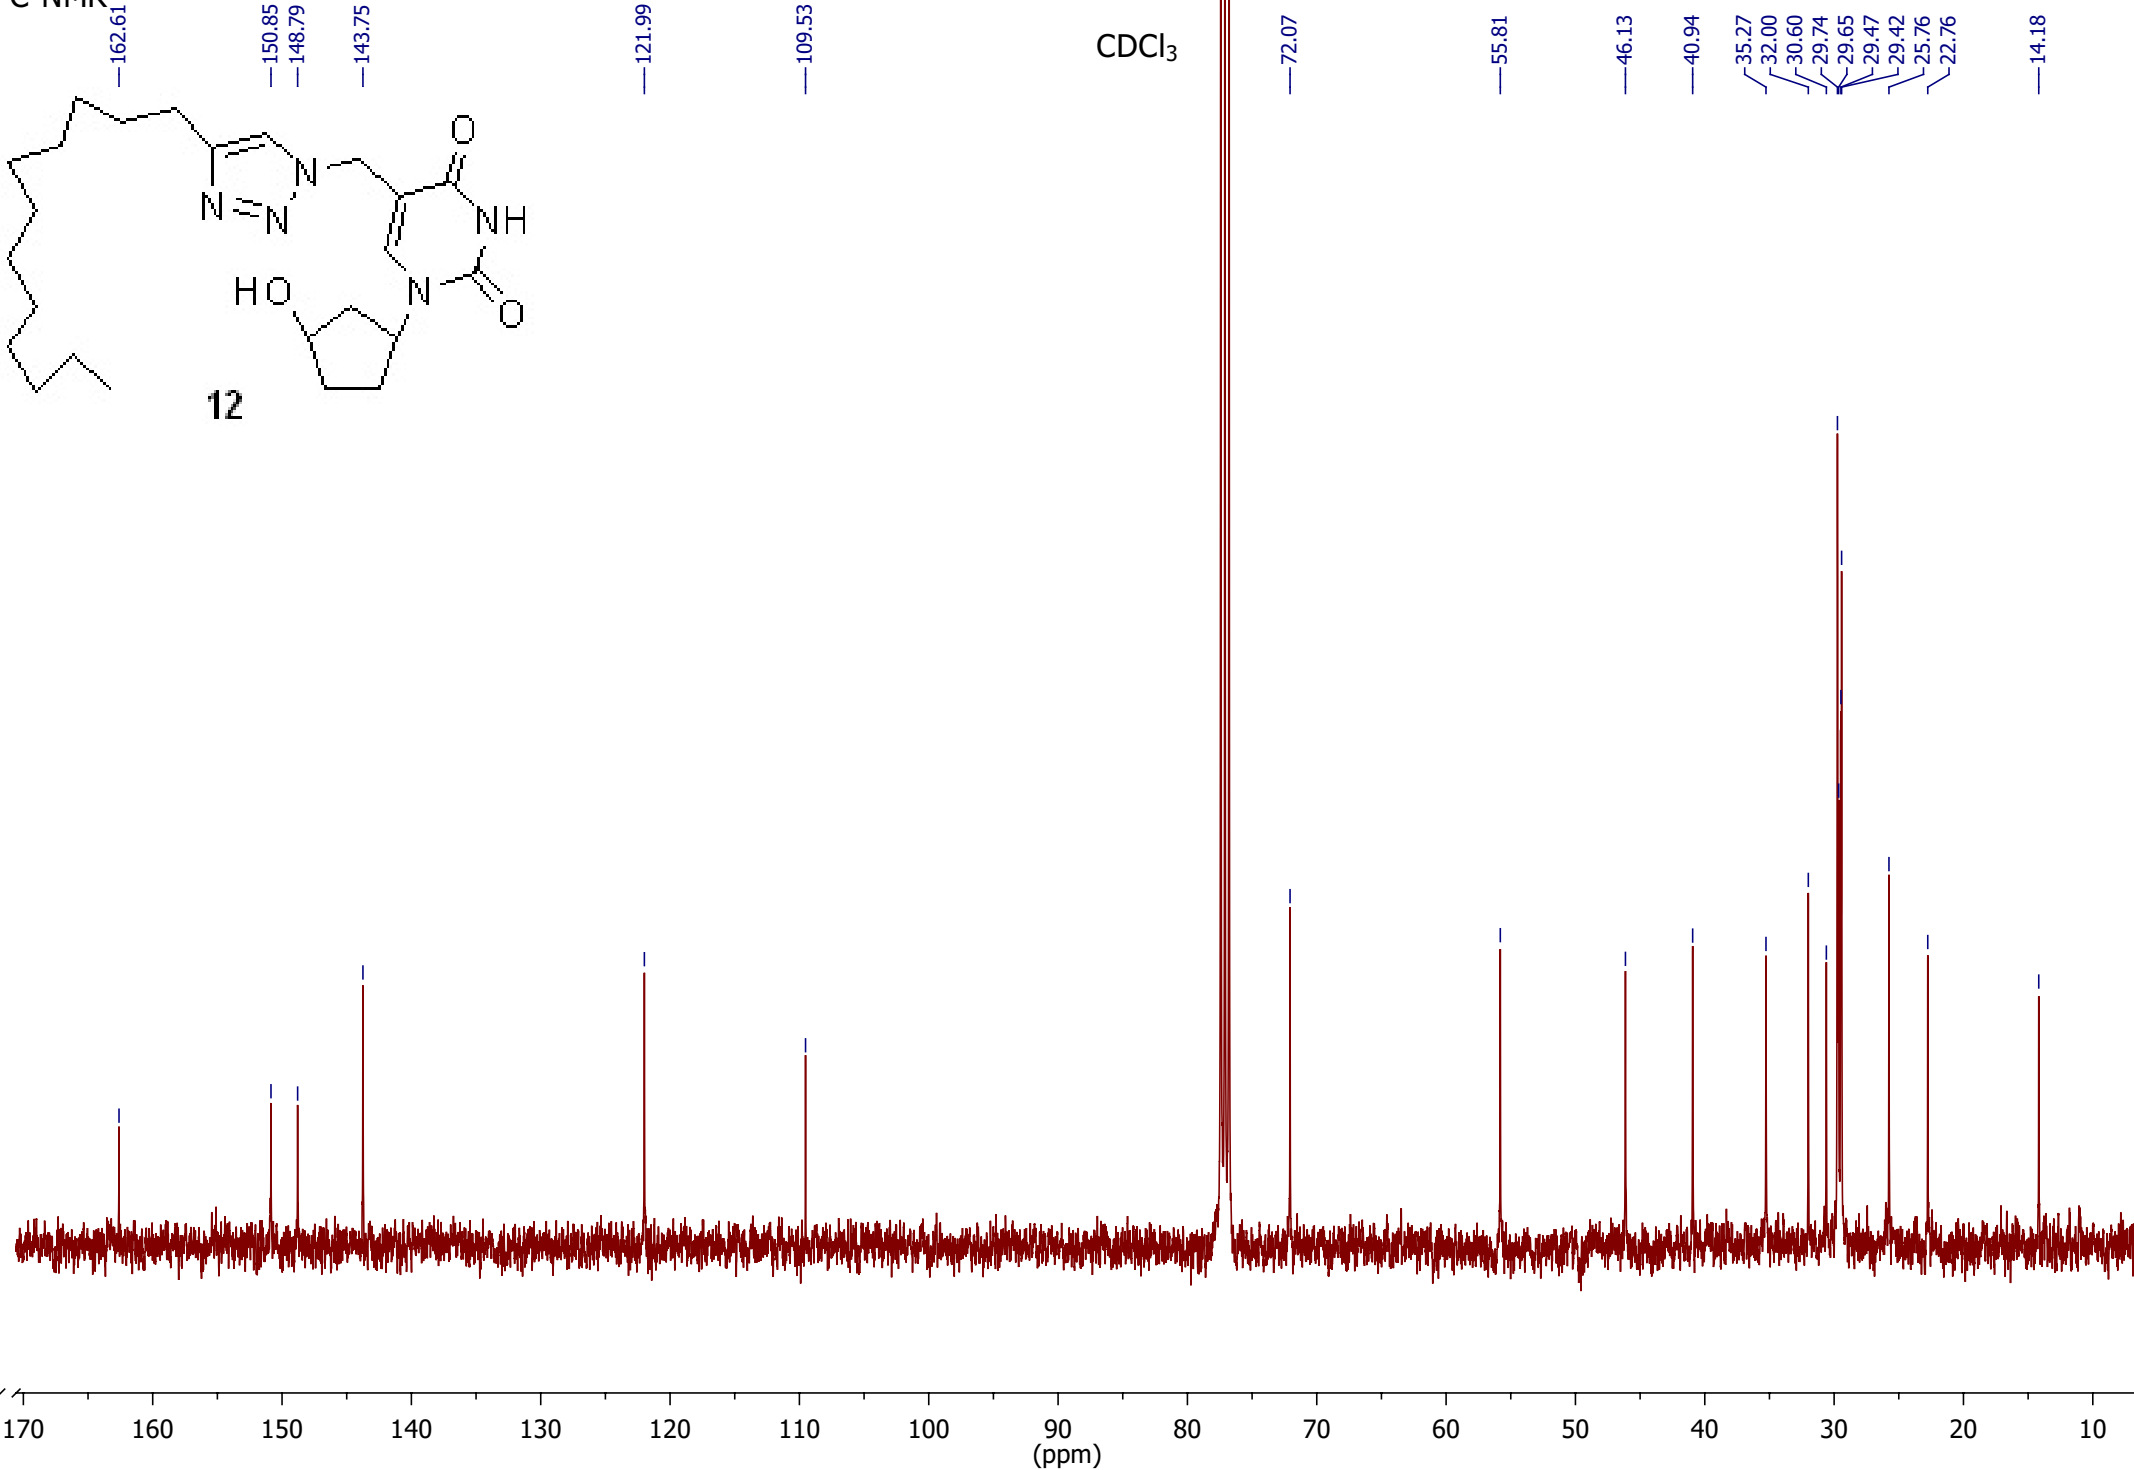

**Table .** The antimycobacterial activity of 5'-norcarbocyclic derivatives of 5-substituted uracil

| Compounds                  | Concentration, $\mu\text{g/ml}$ | <i>M.tuberculosis</i> H37Rv                     |                       |                           | <i>M.tuberculosis</i> MS-115                    |                       |                           |
|----------------------------|---------------------------------|-------------------------------------------------|-----------------------|---------------------------|-------------------------------------------------|-----------------------|---------------------------|
|                            |                                 | Culture growth initiation, days (Mean $\pm$ SD) | Growth inhibition (%) | MIC(99), $\mu\text{g/ml}$ | Culture growth initiation, days (Mean $\pm$ SD) | Growth inhibition (%) | MIC(99), $\mu\text{g/ml}$ |
| drug-free control          |                                 | 6,00 $\pm$ 0,12                                 | -                     | -                         | 5,66 $\pm$ 0,02                                 | -                     | -                         |
| INH                        | 0,1                             | No culture growth                               | 100                   | $\leq$ 0,1                | 5,80 $\pm$ 0,02                                 | No                    | >100                      |
| RIF                        | 1                               | No culture growth                               | 100                   | $\leq$ 1                  | 5,73 $\pm$ 0,08                                 | No                    | >50                       |
| LFX                        | 1,5                             | No culture growth                               | 100                   | $\leq$ 1,5                | No culture growth                               | 100                   | $\leq$ 1,5                |
| <b>(<math>\pm</math>)3</b> | 2,5                             | 6,02 $\pm$ 0,25                                 | No                    | 20                        | 5,72 $\pm$ 0,09                                 | No                    | 20                        |
|                            | 5                               | 7,37 $\pm$ 0,64                                 | No                    |                           | 5,95 $\pm$ 0,11                                 | No                    |                           |
|                            | 10                              | 9,80 $\pm$ 0,40                                 | 90                    |                           | 7,74 $\pm$ 0,34                                 | 75                    |                           |
|                            | 20                              | 11,05 $\pm$ 3,54                                | 99                    |                           | 12,23 <sup>1)</sup>                             | 99                    |                           |
|                            | 50                              | 8,57 $\pm$ 0,27 <sup>1)</sup>                   | 99                    |                           | No culture growth                               | 100                   |                           |
| <b>(<math>\pm</math>)7</b> | 2,5                             | 5,82 $\pm$ 0,09                                 | No                    | 50                        | 5,62 $\pm$ 0,06                                 | No                    | 20                        |
|                            | 5                               | 6,14 $\pm$ 0,05                                 | No                    |                           | 5,84 $\pm$ 0,10                                 | No                    |                           |
|                            | 10                              | 8,11 $\pm$ 0,23                                 | 75                    |                           | 6,48 $\pm$ 0,11                                 | No                    |                           |
|                            | 20                              | 9,31 $\pm$ 0,31                                 | 90                    |                           | 12,35 $\pm$ 2,00 <sup>1)</sup>                  | 99                    |                           |
|                            | 50                              | 10,38 <sup>1)</sup>                             | 99                    |                           | No culture growth                               | 100                   |                           |
| <b>(<math>\pm</math>)8</b> | 2,5                             | 5,17 $\pm$ 0,04                                 | No                    | 50                        | 5,65 $\pm$ 0,15                                 | No                    | 50                        |
|                            | 5                               | 5,27 $\pm$ 0,05                                 | No                    |                           | 5,58 $\pm$ 0,09                                 | No                    |                           |
|                            | 10                              | 5,81 $\pm$ 0,06                                 | No                    |                           | 5,85 $\pm$ 0,11                                 | No                    |                           |
|                            | 20                              | 7,73 $\pm$ 0,27                                 | No                    |                           | 6,84 $\pm$ 0,27                                 | No                    |                           |
|                            | 50                              | No culture growth                               | 100                   |                           | No culture growth                               | 100                   |                           |

<sup>1)</sup> growth in one sample from three
